1           CAN CARBON NANOFIBERS AFFECT ANUROFAUNA? STUDY INVOLVING  
2           NEOTROPICAL *Physalaemus cuvieri* (Fitzinger, 1826) TADPOLES

3  
4           Abraão Tiago Batista Guimarães<sup>1,2</sup>, Fernanda Neves Estrela<sup>1,2</sup>, Aline Sueli de Lima Rodrigues<sup>1</sup>,  
5           Rafael Henrique Nóbrega<sup>3</sup>, Ives Charlie-Silva<sup>4</sup>, Guilherme Malafaia<sup>1,2,5,6</sup> #

6  
7           <sup>1</sup>Post-Graduation Program in Biotechnology and Biodiversity, Federal University of Goiás, Goiânia,  
8           Brazil.

9           <sup>2</sup> Biological Research Laboratory, Goiano Federal Institute – Urutaí Campus, Urutaí, Brazil

10          <sup>3</sup>Reproductive and Molecular Biology Group, Morphology Department, São Paulo State University,  
11          Botucatu, Brazil.

12          <sup>4</sup>Department of Pharmacology, Institute of Biomedical Sciences, University of São Paulo, São Paulo,  
13          Brazil.

14          <sup>5</sup>Post-Graduation Program in Cerrado Natural Resources Conservation, Goiano Federal University –  
15          Urutaí Campus, Urutaí, Brazil

16          <sup>6</sup>Post-Graduation Program in Ecology and Natural Resources Conservation, Federal University of  
17          Uberlândia, Uberlândia, Brazil.

18  
19  
20          #**Corresponding Author:** Biological Research Laboratory, Goiano Federal Institution – Urutaí  
21          Campus. Rodovia Geraldo Silva Nascimento, 2,5 km, Zona Rural, Urutaí, GO, Brazil. CEP: 75790-  
22          000. Phone number: +55 64 3465 1995. E-mail: [guilhermeifgoiano@gmail.com](mailto:guilhermeifgoiano@gmail.com)

23

24 **ABSTRACT**

25 Although carbon nanotubes' (CNTs) toxicity in different experimental systems (*in vivo* and *in vitro*)  
26 is known, little is known about the toxic effects of carbon nanofibers (CNFs) on aquatic vertebrates.  
27 We herein investigated the potential impact of CNFs (1 and 10 mg/L) by using *Physalaemus cuvieri*  
28 tadpoles as experimental model. CNFs were able to induce nutritional deficit in animals after 48-h  
29 exposure to them, and this finding was inferred by reductions observed in body concentrations of  
30 total soluble carbohydrates, total proteins, and triglycerides. The increased production of hydrogen  
31 peroxide, reactive oxygen species and thiobarbituric acid reactive substances in tadpoles exposed to  
32 CNFs has suggested REDOX homeostasis change into oxidative stress. This process was correlated  
33 to the largest number of apoptotic and necrotic cells in the blood of these animals. On the other  
34 hand, the increased superoxide dismutase and catalase activity has suggested that the antioxidant  
35 system of animals exposed to CNFs was not enough to maintain REDOX balance. In addition,  
36 CNFs induced increase in acetylcholinesterase and butyrylcholinesterase activity, as well as changes  
37 in the number of neuromats evaluated on body surface (which is indicative of the neurotoxic effect  
38 of nanomaterials on the assessed model system). To the best of our knowledge, this is the first report  
39 on the impact of CNFs on amphibians; therefore, it broadened our understanding about  
40 ecotoxicological risks associated with their dispersion in freshwater ecosystems and possible  
41 contribution to the decline in the populations of anurofauna species.

42 **Keywords:** Nanopollutants, neurotoxicity, cytotoxicity, REDOX imbalance, bioaccumulation.

43

44

## 45 1. INTRODUCTION

46 The recent scientific and technological development, and the invention of nanomaterials  
47 have allowed the creation and production of highly promising and advantageous materials that have  
48 been applied to address several challenges associated with conventional Science (Bhagyaraj &  
49 Oluwafemi, 2018). Nanomaterials are gaining more and more interest given their unique properties  
50 and potential use in a wide range of technological applications. Recent studies have gathered vast  
51 information on the use of these materials by the food (Chaudhary et al., 2020; Shafiq et al., 2020),  
52 cosmetics (Fytianos et al., 2020; Singh et al., 2020) and civil construction sectors ( Firoozi et al.,  
53 2020; Singh, 2020), as well as in the manufacture of personal care (Keller et al., 2014; Kaul et al.,  
54 2018; Aziz et al., 2019), electronic (Zeb et al., 2019), medicinal and pharmaceutical (Velu et al.,  
55 2020; Das et al., 2020; Siddique & Chow, 2020; Kumar et al., 2020) and industrial products  
56 (Thomas et al., 2019; Palit & Hussain, 2020), and in different environmental sciences fields (Taran  
57 et al., 2020).

58 Carbon nanofibers (CNFs) that have conductivity and stability similar to that of carbon  
59 nanotubes (CNTs) (Lake & Lake, 2014; Mohamed et al., 2019; Yadav et al., 2020) are among the  
60 most prominent nanomaterials in recent years. The main features of CNFs distinguishing them from  
61 CNTs is the stacking of graphene sheets at different shapes. These sheets produce more edge sites  
62 on the outer wall of CNFs than CNTs, and it makes the electron transfer of electroactive analytes  
63 easier (Yadav et al., 2020). However, CNFs' application has mainly focused on catalyst supports  
64 (Din et al., 2020), gas-storage systems (Conte et al., 2020), polymer reinforcements (Abdo et al.,  
65 2020), probe tips (Cui et al., 2004; Goto et al., 2014) and biosensor development, due to their  
66 unique physical and chemical properties (good electrical conductivity, high surface area,  
67 biocompatibility, inherent and induced chemical functionalities, and easy manufacture) (Saunier et  
68 al., 2020; Senthamizhan et al., 2020).

69 However, the assessment of ecological risks remain an incipient field involving CNFs, despite  
70 their dispersion and distribution in ecosystems - studies carried out with CNTs are much more  
71 numerous and comprehensive (Freixa et al., 2018; Gomes et al., 2021). Few investigations with  
72 CNFs include assays (Magrez et al., 2006; Brown et al., 2007; Jensen et al., 2012; Kalman et al.,  
73 2019) or experiments *in vitro* with invertebrates (Lee et al., 2015) or mammals (DeLorme et al.,  
74 2012; Jensen et al., 2012; Warheit, 2019). A small portion of studies *in vivo* has evaluated the effects  
75 of these nanomaterials on aquatic freshwater organisms (Chaika et al., 2020; Gomes et al., 2021;  
76 Montalvão et al., 2021). However, there is still an important gap in assessments on risk factors  
77 posed to, and physiological changes induced by, these compounds in aquatic organisms. Chaika et  
78 al. (2020) assessed CNF effects on the digestive system of different freshwater invertebrates

79 (Families: Gammaridae, Ephemerellidae and Chironomidae), but they did not observe any  
80 histopathotoxic effect on animals' gastrointestinal tract. In fact, these authors have shown the  
81 ability of *Gammarus suifunensis* to biodegrade CNFs (Chaika et al. 2020). Gomes et al. (2021) have  
82 evidenced that CNFs can be transferred by an experimental food chain (*Eiseia fetida* > *Danio rerio*  
83 > *Oreochromis niloticus*) and cause mutagenic and cytotoxic damage at the uppermost trophic level.  
84 Montalvão et al. (2021) reported that dragonfly larvae (*Aphylla williamsoni*) short-term exposure (48  
85 h) to CNFs induced predictive changes in REDOX imbalance and neurotoxicity - this finding was  
86 inferred by suppressing the activity of acetylcholinesterase (AChE).

87 Therefore, the inconclusive character of the investigative scenario about CNFs' toxicity, as  
88 well as the gaps on knowledge about the impact of these nanomaterials on several groups of  
89 invertebrates and vertebrates are clear factors, so far. Amphibians are among these groups, but,  
90 although they have priceless ecological importance (Hocking & Babbitt, 2014), they have never  
91 been the subject of investigations involving CNFs. Our knowledge about the toxicity of carbon-  
92 based nanomaterials (CNs) in amphibians is restricted to information available in reports by Saria et  
93 al. (2014) and Zhao et al. (2020). These authors were the first to show that the short-term exposure  
94 of *Xenopus laevis* tadpoles to multi-walled carbon nanotubes (MWCNTs) induced oxidative stress  
95 and caused damage to animals' erythrocyte DNA. Zhao et al. (2020) reported MWCNT  
96 accumulation in different organs of tadpoles belonging to species *X. tropicalis* increased their  
97 lethality rate and changed their heart rate. Thus, it is imperative carrying out further studies to  
98 assess how CNTs can have impact on the anurofauna and ecotoxicological effects of CNFs. These  
99 complementary investigations are essential, since amphibians are organisms sensitive to changes in  
100 their habitats (Roy, 2002; Wagner et al., 2014; Rohman et al., 2020), and are included in the list of  
101 animals presenting significant population decline in recent years (Green et al., 2020).

102 Accordingly, we evaluated the likely toxicological effects of CNFs on tadpoles belonging to  
103 neotropical species *Physalaemus cuvieri* (Anura, Leptodactylidae). This species is exclusively  
104 distributed in South America and is typical of open biomes, such as Cerrado, Caatinga, Chaco and  
105 Llanos (Mijares et al., 2011; De-Oliveira-Miranda et al., 2019). Although the species is currently  
106 categorized as of "little concern" by the International Union for Conservation of Nature (stable,  
107 least concern, version 2020-3) (IUCN, 2020), its wide geographical distribution and presumed large  
108 populations, are features turning them into interesting model systems, since they can inhabit  
109 freshwater environments subjected to different pollution types, including CNFs. From different  
110 biomarkers, We herein aimed at testing the hypothesis that short exposure to CNFs (at  
111 environmentally relevant concentrations) induces changes in the nutritional status, metabolic  
112 changes altering REDOX homeostasis into oxidative stress, and cytotoxic and neurotoxic changes in

113 these animals. To the best of our knowledge, this is the first report on the biological impact of CNFs  
114 on a specific amphibian species. Therefore, this study has broadened our understanding about  
115 ecological risks associated with water pollution by these nanomaterials, as well as motivated further  
116 investigations on the impact of CNs on amphibians' health and on the dynamics of their natural  
117 populations.

## 118 2. MATERIALS AND METHODS

### 119 2.1. Carbon nanofibers

120 We used pyrolytically stripped CNFs (i.e., polyaromatic hydrocarbons removed from fibers' surface)  
121 provided by Sigma-Aldrich (San Luis, Missouri, USA) - their detailed chemical featuring was presented by  
122 Gomes et al. (2021). These pollutants are a mix of different sized and shaped CNFs [from 60 to 100 nm  
123 (mean:  $86.85 \pm 1.80$  nm)], including the ones with open and clearly curved tips (Figure 1). According to the  
124 manufacturer, and as seen in the photoelectric micrographs taken during the transmission electron  
125 microscopy analysis, the assessed CNFs have different metallic particles (Ca, Si, S, Na, Mg and Fe), used as  
126 catalysts (Figure 1).

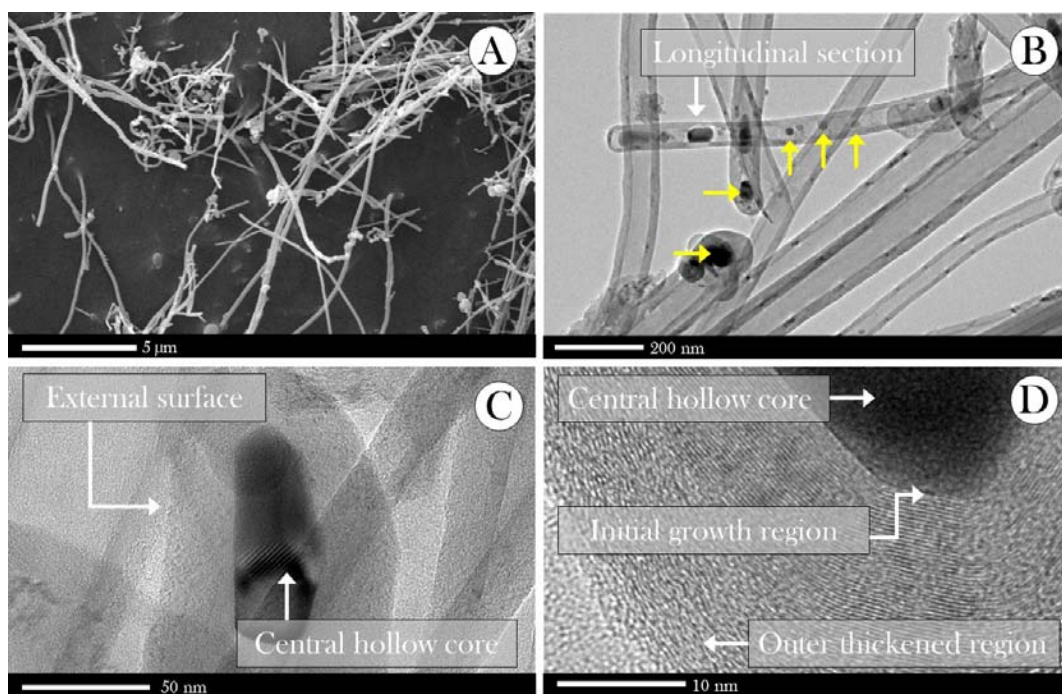

**Figure 1.** (A) Scanning electron microscopy images and (B-D) transmission electron microscopy images of a CNF film, at different magnifications. Yellow arrows point out the presence of metallic particles inside CNFs, or around their surface, as shown in (D).

127

### 128 2.2. Model system and experimental design

129 We used tadpoles belonging to species *P. cuvieri* (Anura, Leptodactylidae) as model system  
130 to assess the aquatic toxicity of CNFs. Its wide geographical distribution in South America (Miranda

131 et al., 2019), stability and population abundance in the occupied areas (Frost, 2017), good  
132 adaptability to laboratory environment, early biological response to changes in its environment, and  
133 use in recent (eco) toxicological studies justify their choice as model in our study (Herek et al.,  
134 2020; Araújo et al., 2020ab; Rutkoski et al., 2020). All tadpoles used in the experiment came from  
135 an ovigerous mass with approximately 1,500 eggs, based on Pupin et al. (2010). The ovigerous mass  
136 was collected in a lentic environment (Urutaí, GO, Brazil) surrounded by native Cerrado biome,  
137 under license n. 73339-1 - issued by the Brazilian Biodiversity Authorization and Information  
138 System (SISBIO/MMA/ICMbio).

139 Eggs were kept in aquarium (40.1 x 45.3 x 63.5 cm) filled with 80 L of naturally  
140 dechlorinated water (for at least 24 h), under controlled 12h light-dark photoperiod and  
141 temperature ( $26^{\circ}\text{C} \pm 1^{\circ}\text{C}$  - similar to that of the natural environment) conditions, and constant  
142 aeration (by air compressors) from the time they were taken to the laboratory. Animals were fed  
143 once a day (ad libitum) with commercial fish food (formula: 45% crude protein, 14% ether extract,  
144 5% crude fiber, 14% mineral matter and 87% dry matter). Tadpoles remained under the  
145 aforementioned conditions until they reached stage 27G (body biomass:  $70\text{ mg} \pm 4.1\text{ mg}$ ; and total  
146 length:  $20.1\text{ mm} \pm 0.7\text{ mm}$  - mean  $\pm$  SEM), after egg hatching, based on Gosner (1960). The  
147 healthy tadpoles (i.e., the ones presenting normal swimming movements and no morphological  
148 deformities or apparent lesions) were divided into three experimental groups (n = 195  
149 tadpoles/each - 13 replicates composed of 15 animals/each). The control group (C) was composed of  
150 tadpoles kept in dechlorinate tap water (CNFs free) and groups CNF-I and CNF-II comprised  
151 animals exposed to water added with CNFs at concentrations of 1 and 10 mg/L, respectively (see  
152 below).

153

### 154 2.3. Exposure conditions and CNF concentrations

155 All experimental groups were kept in polyethylene containers filled with 180 mL of  
156 dechlorinated water where CNFs were diluted in. Exposure time was set at 48 h (static system) to  
157 simulate ephemeral exposure. Animals' food was kept during exposure - commercial feed was offered  
158 once a day. Concentrations of the tested CNFs were defined based on aquatic CNT concentrations,  
159 due to lack of information about environmental concentrations recorded for CNFs. Therefore,  
160 previous studies evaluating CNTs' toxicity in different experimental models based on concentrations  
161 ranging from 0.1 to 100 mg/L were taken as basis to select CNF concentrations used in the current  
162 research (Mouchet et al., 2007; Mouchet et al., 2009; Mouchet et al., 2010; Mouchet et al., 2011;  
163 Bourdiol et al., 2013; Saria et al., 2014; Verneuil et al., 2015; Zhao et al., 2020; Tavabe et al.,  
164 2020). We herein applied the monitoring MWCNT data recorded by Nezhadheydari et al. (2019) in

165 aquatic environments and the experimental design proposed by Tavabe et al. (2020). The  
166 aforementioned authors observed concentration up to 20 mg/L of these materials, and it proved the  
167 significant changes in it (ng/L to mg/L). Concentrations tested in the current study were  
168 environmentally relevant, and it takes the present experimental design closer to realistic CNF-  
169 pollution conditions. The herein adopted concentrations represented both optimistic (less pollution;  
170 1 mg/L) and pessimistic (higher pollution; 10 mg/L) conditions.

171

172

## 173 **2.4. Toxicity biomarkers**

### 174 **2.4.1. Biochemical assessments**

#### 175 **2.4.1.1. Sample preparation**

176 Samples were prepared based on Guimarães et al. (2021), with modifications, to evaluate the  
177 biochemical parameters. In total, 144 tadpoles were used per experimental group (n = 12 samples,  
178 composed of a pool of 12 animals/each). These animals were weighed, macerated in 1 mL of  
179 phosphate buffered saline (PBS) solution and centrifuged at 13,000 rpm, for 5 min (at 4°C). The  
180 supernatant was separated into aliquots to be used in different biochemical evaluations. Whole  
181 bodies were used due to technical limitations in isolating certain organs from small animals. Unlike  
182 assessments in adult specimens, organ-specific biochemical assessment carried out in tadpoles  
183 require highly accurate dissection due to their small sized-bodies, which makes it difficult processing  
184 large numbers of samples under time constraint (Khan et al. 2015). Organ “contamination” by  
185 organic matter and/or by other particles consumed by tadpoles can be a bias for the biochemical  
186 analysis applied to organs during dissection time (Lusher et al. 2017; Guimarães et al., 2021).

187

#### 188 **2.4.1.2. Nutritional status**

189 Different pollutants can affect the nutritional status of tadpoles (Bharatraj & Yathapu,  
190 2018); therefore, we evaluated total soluble carbohydrate, total protein, and triglyceride  
191 concentrations in different tissues of the exposed animals. Total soluble carbohydrate levels were  
192 determined through the Dubois method (Dubois et al., 1956) - detailed by Estrela et al. (2021).  
193 Protein level was determined in commercial kit (Bioténica Ind. Com. LTD, Varginha, MG, Brazil.  
194 CAS number: 10.009.00), based on biuret reaction (Gornall et al., 1949; Henry et al., 1957).  
195 Triglyceride levels were evaluated based on Bucolo & Davis (1973) by using a commercial kit  
196 (Bioténica Ind. Com. LTD, Varginha, MG, Brazil. CAS number: 10.010.00).

197

#### 198 **2.4.1.3. REDOX state**

#### 199 **2.4.1.3.1. Oxidative stress biomarkers**

200 Likely oxidative stress increase was assessed based on indirect nitric oxide (NO)  
201 determination, REDOX regulated processes through nitrite measurement (Soneja et al. 2005),  
202 thiobarbituric acid reactive species (TBARS) [predictive of lipid peroxidation (De-Leon & Borges,  
203 2020)], reactive oxygen species (ROS) production and on hydrogen peroxide (H<sub>2</sub>O<sub>2</sub>) - which plays  
204 essential role in responses to oxidative stress, in different cell types (Sies, 2020; Sies et al., 2020).  
205 The Griess colorimetric reaction [based on Bryan et al., (2007)] was used to measure nitrite  
206 concentrations. TBARS levels were determined based on procedures described by Ohkawa et al.  
207 (1979) and modified by Sachett et al. (2020). H<sub>2</sub>O<sub>2</sub> and ROS production was assessed based on the  
208 methodological procedures proposed by Elnemma et al. (2004) and Maharajan et al. (2018),  
209 respectively.

210

#### 211 **2.4.1.3.2. Antioxidant response biomarkers**

212 The activation or suppression of antioxidant activity in animals exposed to different CNF  
213 concentrations was evaluated by determining catalase and superoxide dismutase (SOD) activity.  
214 These enzymes are considered first-line antioxidants important for defense strategies against  
215 oxidative stress (Ighodaro & Akinloye, 2018). Catalase activity was assessed based on Sinha et al.  
216 (1972) [see details in Montalvão et al. (2021)] and SOD was determined according to the method  
217 originally described by Del-Maestro & McDonald (1985) and adapted by Estrela et al. (2021).

218

#### 219 **2.4.1.4. Cytotoxicity**

220 Blood samples were collected to assess cytotoxic effects induced by CNFs through  
221 erythrocytic apoptosis or necrosis. Procedures like those described by Singla & Dhawan (2013) and  
222 García-Rodríguez et al. (2013) were herein adopted. Briefly, 0.5-1.0 µL of blood from two animals in  
223 each group (n=16 por grupo) was mixed to 200 µL of PBS. Subsequently, 50 µL of acridine orange  
224 dye solution (AO) and 50 µL of ethidium bromide (EB) solution (both at 1 µg/mL) were added to  
225 the mix, which was incubated at room temperature, for 5 min. Samples were then centrifuged (at  
226 13,000 rpm and 4°C, for 5 min). The pellet was resuspended, placed on slide and covered with a  
227 glass cover slip after the supernatant was discarded. A barrier filter for immediate evaluation under  
228 fluorescence microscope (BEL Engineering®, model FLUO3 - excitation 510-560 nm) was used in  
229 the experiment. The total number of 100 cells from each slide was scored for apoptosis extent  
230 quantification. Living cells were green, apoptotic cells were orange and presented fragmented nuclei,  
231 and necrotic cells were red (Kasibhatla et al., 2006; Singla & Dhawan, 2013). The rate of each cell  
232 type, in each animal, was calculated.



#### 233 **2.4.1.4. Neurotoxicity**

234 The induction of likely neurotoxic effect caused by CNFs was evaluated by determining  
235 acetylcholinesterase (AChE) activity based on the method by Ellman et al. (1961) and the activity  
236 of butyrylcholinesterase (BChE) - also known as serum cholinesterase or pseudocholinesterase -  
237 based on Silva et al. (2020). We also evaluated whether CNFs could change the viability of  
238 neuromats living on tadpoles' surface (Russell, 1976) - this feature has been considered a good  
239 ecotoxicological biomarker (Guimarães et al., 2021). Accordingly, 10 living tadpoles from each  
240 group were exposed (for 15 min) to water reconstituted with 4-(4-Diethylaminostyryl)-1-  
241 methylpyridinium iodide (4-Di-2-ASP) at 5 mM, similar to procedures adopted by Krupa et al.  
242 (2020) and Guimarães et al. (2021). Subsequently, animals were anesthetized (on ice) and taken to  
243 fluorescence microscope (BEL Engineering®, model FLUO3 - excitation 510-560 nm) to have  
244 images of their heads and tails captured. The number of neuromats was manually determined;  
245 neuromats located on the sides of the tadpoles were excluded because they were out of focus or  
246 absent, due to their position in the microscope. We also excluded the lower part of their head and  
247 their back-posterior region, which overall had expressive amounts of non-specific coloring.  
248 Neuromats on the head and tail sides were quantified, as shown in Figure 2.

249

#### 250 **2.6. CNF accumulation**

251 CNF accumulation was estimated by determining total organic carbon (TOC)  
252 concentrations by taking into consideration the specific quantification of CNs in environmental and  
253 biological samples. This process is a huge challenge, given the lack of accessible standard methods to  
254 quantify these nanomaterials (Wang et al., 2013; Chang et al., 2014; Bourdiol et al., 2015; Petersen  
255 et al., 2016). We herein adopted the Walkley-Black method used by Schwab et al. (2011) and  
256 Gomes et al. (2021); this method is based on using dichromate as oxidizer in acid medium (Walkley  
257 & Black, 1934). Detailed methodological procedures can be observed in a previous study carried out  
258 by our research team (Gomes et al., 2021). Results were expressed in “g of TOC/kg of body biomass”  
259 (n = 16/group, 8 samples composed of a pool of 2 animals/each).

260

261

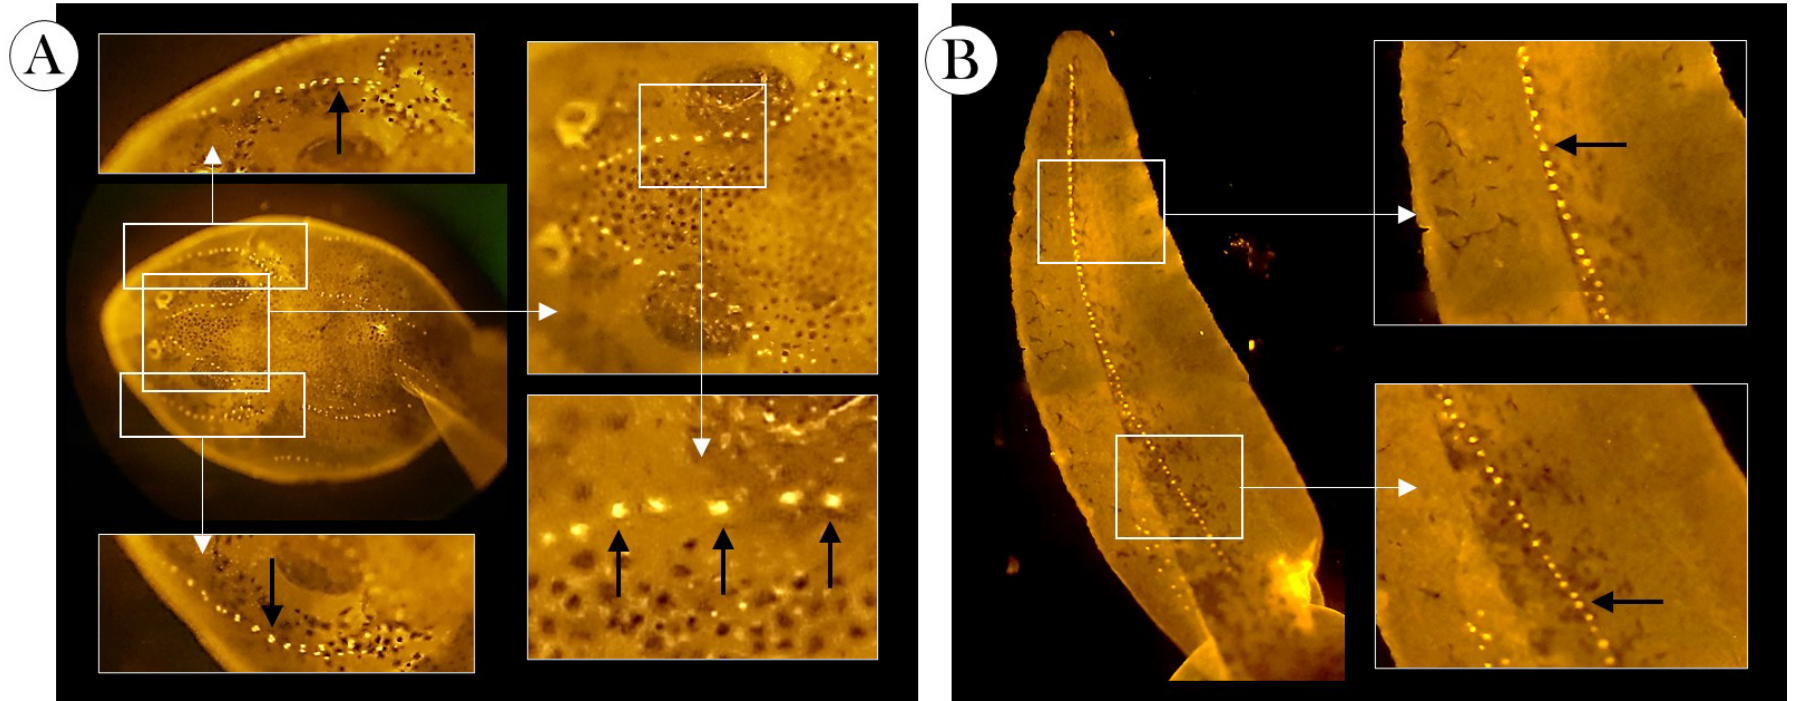

Figure 2. Representative images of the (A) head and (B) tail regions of *P. cuvieri* tadpoles, whose number of superficial neuromats were counted.

262

263

## 264 2.7. Visual assessment

265 Nine tadpoles randomly selected from each group were euthanized on ice and incubated in  
266 acridine orange dye (AO) and ethidium bromide (EB) solution (both at 1  $\mu\text{g}/\text{mL}$ ), at room  
267 temperature for 10 min, in addition to CNF accumulation estimates. Such procedure allowed better  
268 differentiating different regions of animal's body displaying accumulated CNFs. Their animals were  
269 captured in fluorescence microscope (BEL Engineering®, model FLUO3 - excitation 510-560 nm)  
270 for further qualitative evaluation.

271

## 272 2.8. Statistical analysis

273 GraphPad Prism Software Version 8.0 (San Diego, CA, USA) was used to the statistical  
274 analyses. Initially, data were checked for normality and homogeneity variance deviations before the  
275 analysis. Normality data were assessed through Shapiro-Wilks test, and variance homogeneity was  
276 assessed through Bartlette's test. Multiple comparisons were performed by applying one-way  
277 ANOVA and Tukey's post-hoc analysis to non-parametric data or Kruskal-Wallis test, Dunn's  
278 post-hoc test to non-parametric data. Significance levels were set at Type I error (p) values lower  
279 than 0.05, 0.01 or 0.001.

280

## 281 3. RESULTS

282 By assuming the possible interference of CNFs in tadpoles' energy metabolism, we evaluated  
283 the concentration of different macromolecules. Both concentrations recorded for the tested CNFs  
284 have significantly reduced total soluble carbohydrate and total protein levels in these animals,  
285 except for triglyceride levels, whose reduction was only observed in animals in the CNF-II group  
286 (Figure 3) - with no concentration-response effect. Based on our data, CNFs induced nitrite  
287 production increase in animals belonging to group CNF-I (Figure 4A), as well as in  $\text{H}_2\text{O}_2$  and ROS  
288 production in both groups exposed to nanomaterials (Figure 4B-C, respectively), and TBARS  
289 production in animals kept in water added with 10 mg/L of CNFs (Figure 4D).

290

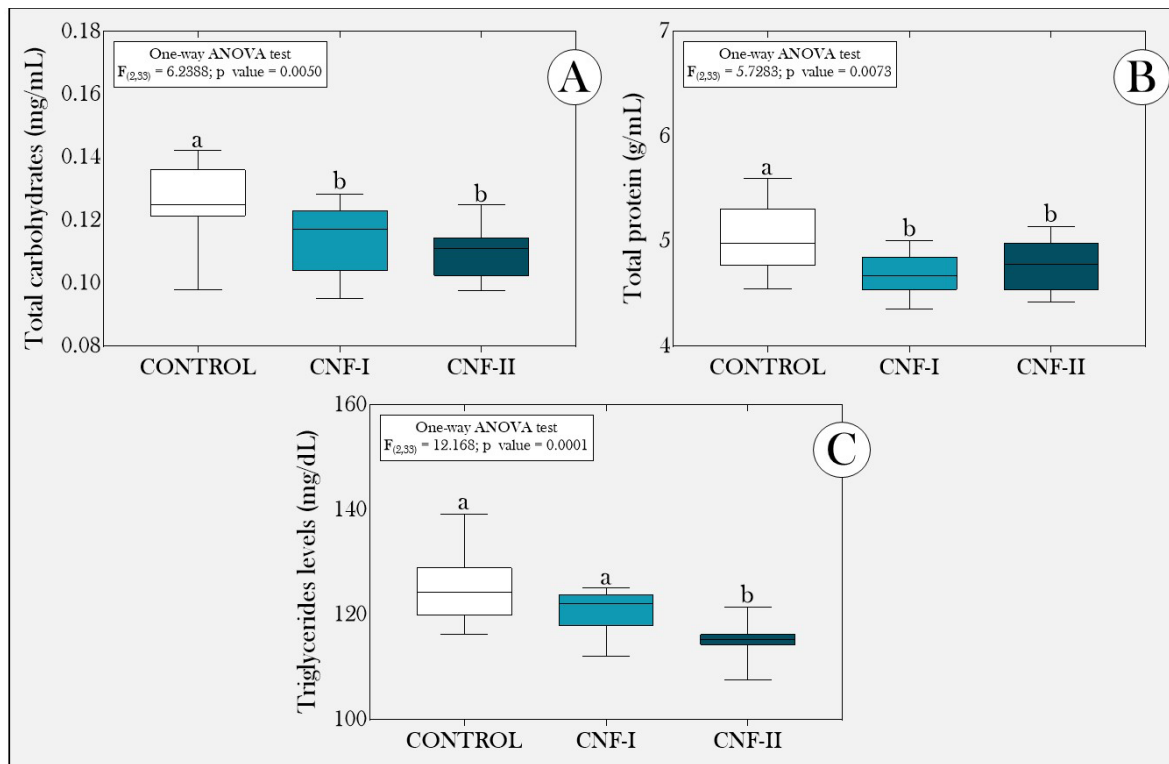

**Figure 3.** Boxplot of (A) total soluble carbohydrate, (B) total protein and (C) triglycerides concentration in *P. cuvieri* tadpoles exposed, or not, to different CNF concentrations. Summaries of statistical analyses are shown in the upper left corner of the figures. Different lowercase letters indicate significant differences between experimental groups. CONTROL: group of tadpoles not exposed to CNFs. CNF-I and CNF-II groups: tadpoles exposed to carbon nanofibers at concentrations of 1 and 10 mg/L, respectively. n = 144 tadpoles/group, 12 samples/group composed of a pool of 12 animals/each.

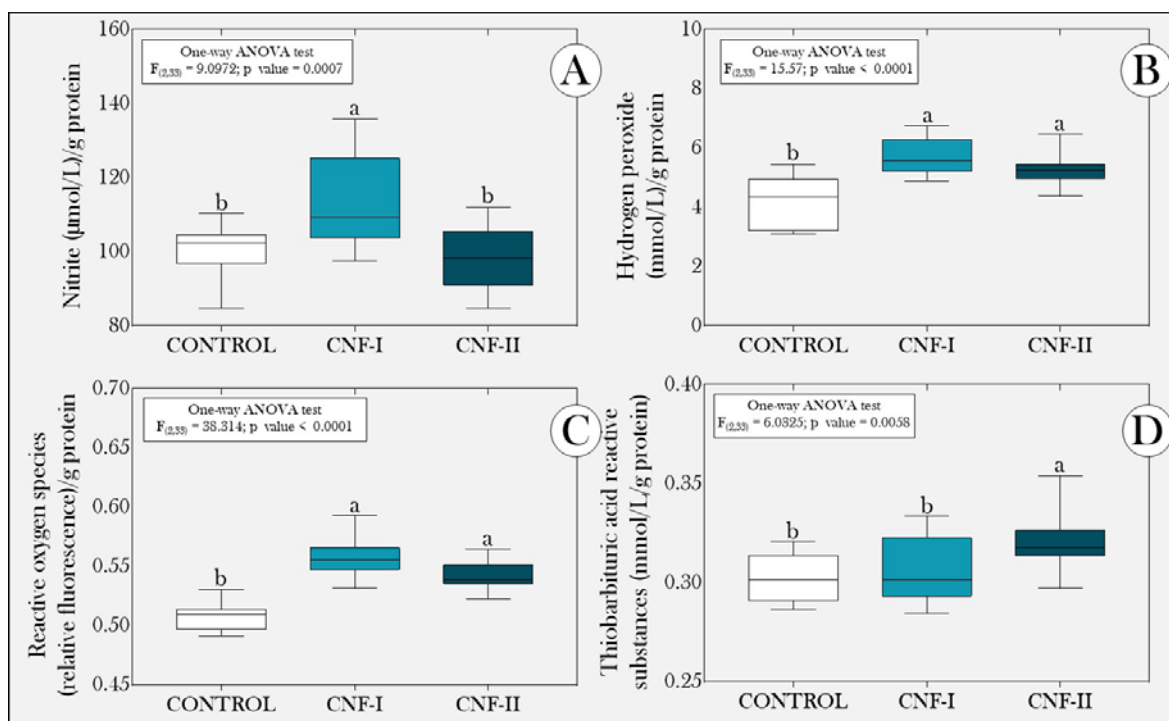

**Figure 4.** Boxplot of (A) nitrite, (B) hydrogen peroxide, (C) reactive oxygen species (ROS) and (D) thiobarbituric acid reactive substances concentrations in *P. cuvieri* tadpoles exposed, or not, to different CNF concentrations. Summaries of statistical analyses are shown in the upper left corner of the figures. Different lowercase letters indicate significant differences between experimental groups. CONTROL group: tadpoles not exposed to CNFs. CNF-I and CNF-II groups: tadpoles exposed to carbon nanofibers at concentrations of 1 and 10 mg / L, respectively (n = 144 tadpoles/group, 12 samples/group composed of a pool of 12 animals/each).

292

293 We observed significant increase in SOD and catalase levels in animals exposed to CNFs ,  
294 but no concentration-response effect (Figure 5A-B, respectively). SOD levels were positively and  
295 significantly correlated to  $\text{H}_2\text{O}_2$ , ROS and TBARS levels (Table 1). Catalase concentrations were  
296 correlated to  $\text{H}_2\text{O}_2$  and ROS production (Table 1).

297

298

299

300

301

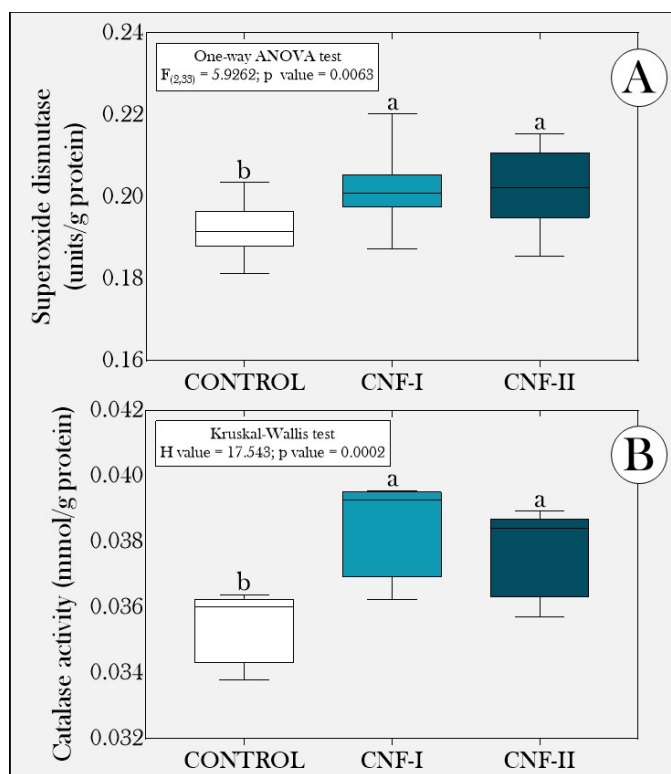

**Figure 5.** Boxplot of (A) superoxide and (B) dismutase concentration in tadpoles belonging to species *P. cwieri* exposed, or not, to different CNF concentrations. Summaries of statistical analyses are shown in the upper left corner of the figures. Different lowercase letters indicate significant differences between experimental groups. CONTROL group: tadpoles not exposed to CNFs. CNF-I and CNF-II groups: tadpoles exposed to carbon nanofibers at concentrations of 1 and 10 mg/L, respectively ( $n = 144$  tadpoles/group, 12 samples/group composed of a pool of 12 animals/each).

302

303 Based on our data, there was cytotoxic effect induced by CNFs on tadpoles' erythrocytes.  
304 Figure 6 depicts that the groups exposed to nanomaterials recorded lower rates of viable  
305 erythrocytes and, consequently, higher rates of apoptotic and necrotic cells than animals in the  
306 control group. The rate of viable cells was negatively and significantly correlated to ROS and  
307 TBARS concentrations (Table 1). According to the neurotoxic evaluation, there was AChE and  
308 BChE increase in animals exposed to nanomaterials, and this finding suggests the stimulatory effect  
309 induced by CNFs on tadpoles' cholinergic system (Figure 7A-B, respectively). On the other hand,  
310 tadpoles exposed to CNFs showed smaller number of superficial neuromats in their heads (Figure  
311 8A) and a larger amount of them in their tail (Figure 8B), but no concentration-response effect.  
312 However, the total number of neuromats (head + tail) did not differ between experimental groups  
313 (Figure 8C).

314

315

316

317 **Table 1.** Summary of correlation analyses carried out between different biochemical biomarkers.

| Correlated biomarkers                  | Spearman r | P value |
|----------------------------------------|------------|---------|
| SOD vs. H <sub>2</sub> O <sub>2</sub>  | 0.4152     | 0.0118  |
| SOD vs. ROS                            | 0.5806     | 0.0002  |
| SOD vs. TBARS                          | 0.5477     | 0.0005  |
| CAT vs. ROS                            | 0.4929     | 0.0023  |
| CAT vs. H <sub>2</sub> O <sub>2</sub>  | 0.3393     | 0.0429  |
| VER vs. ROS                            | -0.5270    | 0.0080  |
| VER vs. TBARS                          | -0.4920    | 0.0150  |
| TBARS vs. AChE                         | 0.3510     | 0.0313  |
| TBARS vs. BChE                         | 0.3710     | 0.0280  |
| H <sub>2</sub> O <sub>2</sub> vs. AChE | 0.5690     | 0.0002  |
| H <sub>2</sub> O <sub>2</sub> vs. BChE | 0.3840     | 0.0223  |
| ROS vs. AChE                           | 0.6270     | 0.0004  |
| ROS vs. BChE                           | 0.5280     | 0.0010  |
| TOC vs. ROS                            | 0.5245     | 0.0029  |
| TOC vs. TBARS                          | 0.3911     | 0.0312  |
| TOC vs. SOD                            | 0.4691     | 0.0136  |
| TOC vs. CAT                            | 0.4269     | 0.0264  |
| TOC vs. APOP                           | 0.4462     | 0.0173  |
| TOC vs. NECR                           | 0.4750     | 0.0106  |
| TOC vs. VER                            | 0.4686     | 0.0119  |
| TOC vs. NH                             | -0.4744    | 0.0081  |
| TOC vs. AChE                           | 0.5777     | 0.0008  |
| TOC vs. BChE                           | 0.5707     | 0.0012  |

318 SOD: superoxide dismutase; H<sub>2</sub>O<sub>2</sub>: hydrogen peroxide; TBARS: thiobarbituric acid reactive

319 substances; AChE: acetylcholinesterase activity; BChE: butyrylcholinesterase activity; APOP: rate

320 of apoptotic erythrocytes; NECR: rate of necrotic erythrocytes; VER: rate of viable erythrocytes;

321 NH: number of neuromats in the tadpoles' heads; TCO: total organic carbon.

322

323

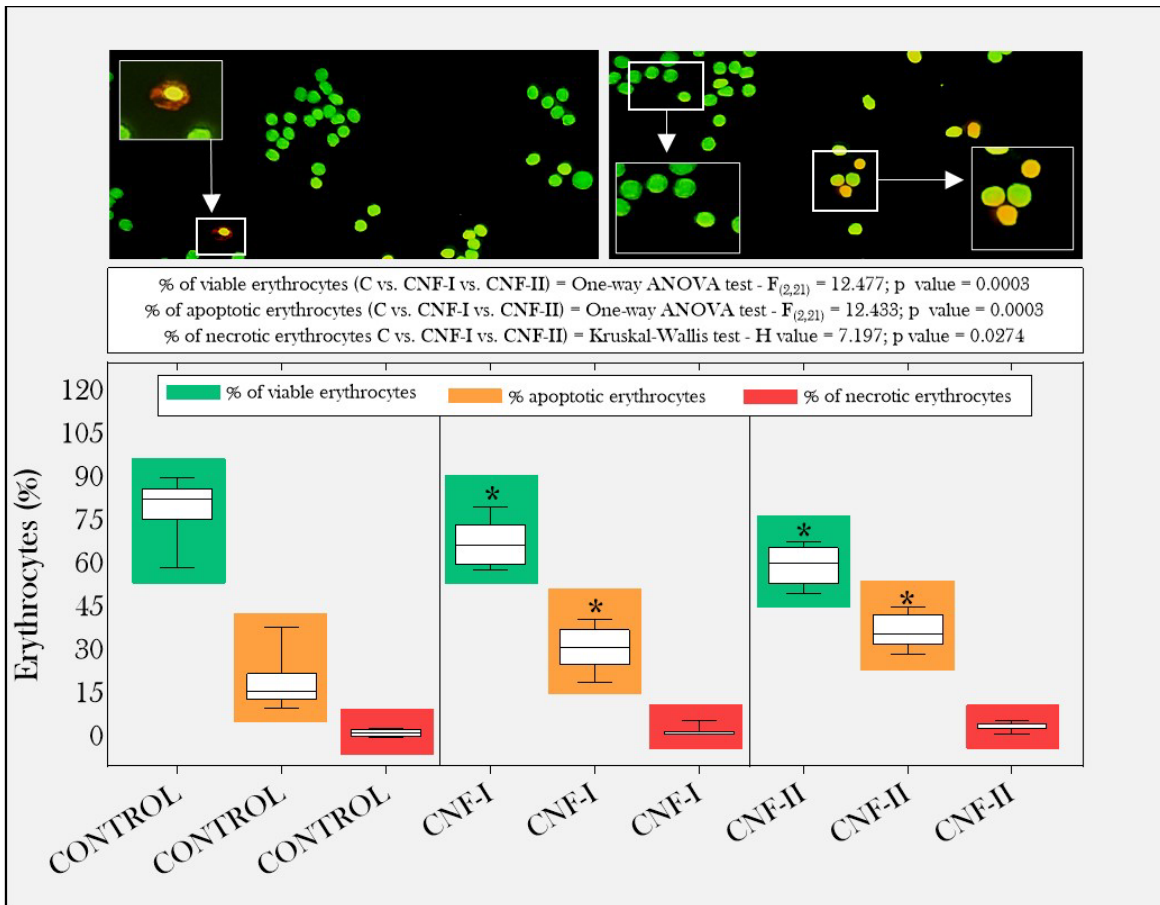

**Figure 6.** Boxplot of viable (green), apoptotic (orange) and necrotic (red) erythrocyte rates in *P. cuvieri* tadpoles exposed, or not, to different CNF concentrations. Fluorescence images representative of acridine orange and ethidium bromide staining are presented above the boxplot. Summaries of statistical analyses are shown in the upper left corner of the figures. Asterisks indicate differences between the respective cell types from each group exposed to CNFs and from the control group. CONTROL group: tadpoles not exposed to CNFs. CNF-I and CNF-II groups: tadpoles exposed to carbon nanofibers at concentrations of 1 and 10 mg/L, respectively (n = 16 tadpoles/group, 8 samples, composed of a pool of two animals/each).



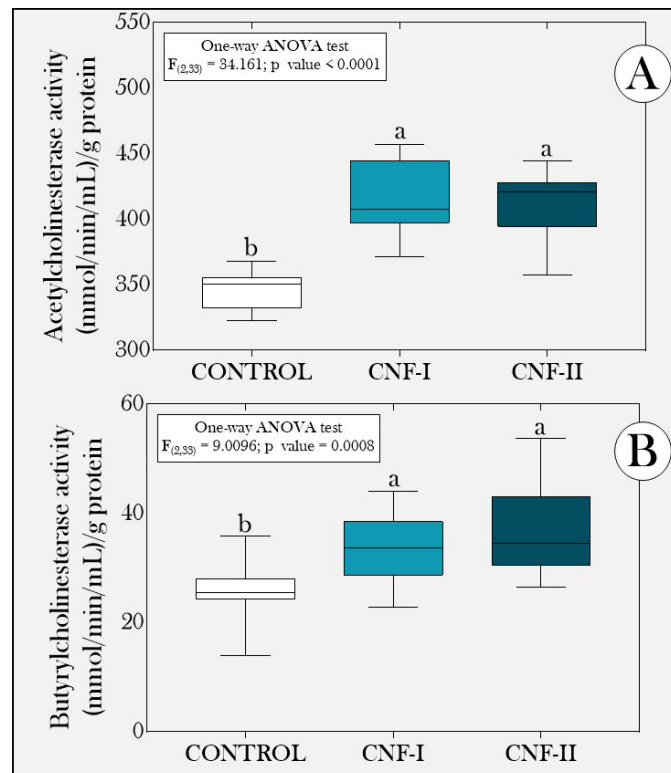

**Figure 7.** Boxplot of (A) acetylcholinesterase and (B) butyrylcholinesterase activity in *P. cwieri* tadpoles exposed, or not, to different CNF concentrations. Summaries of statistical analyses are shown in the upper left corner of the figures. Different lowercase letters indicate significant differences between experimental groups. CONTROL group: tadpoles not exposed to CNFs. CNF-I and CNF-II groups: tadpoles exposed to carbon nanofibers at concentrations of 1 and 10 mg/L, respectively (n = 144 tadpoles/group, 12 samples/group composed of a pool of 12 animals/each).

325

326

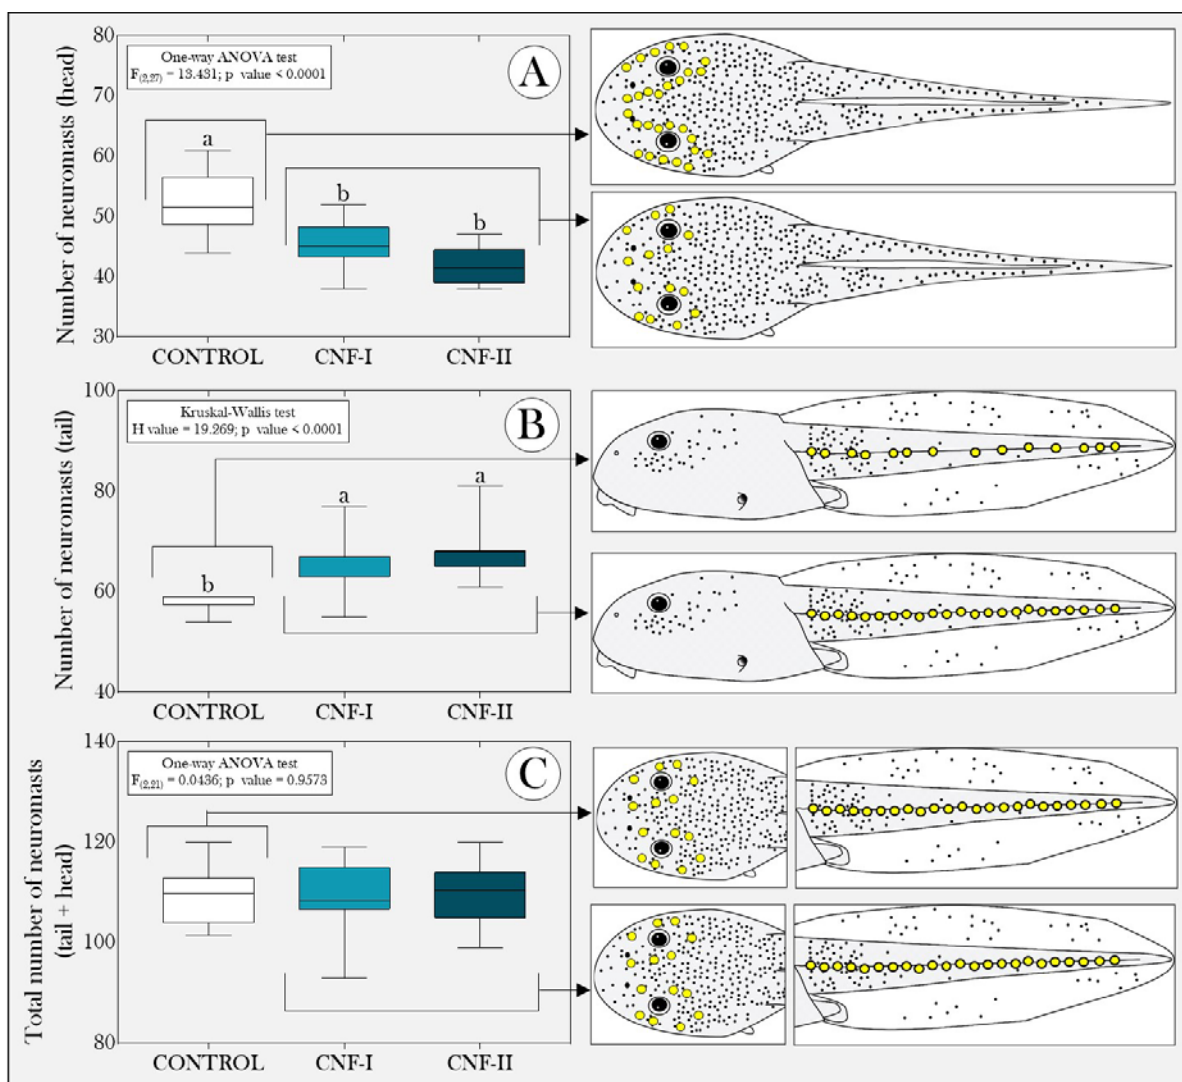

**Figure 8.** Boxplot of number of superficial neuromasts in the (A) head and (B) tail of tadpoles, and the total number (C) of *P. cuvieri* tadpoles exposed, or not, to different CNF concentrations. Summaries of statistical analyses are shown in the upper left corner of the figures. Different lowercase letters indicate significant differences between experimental groups. CONTROL group: tadpoles not exposed to CNFs. CNF-I and CNF-II groups: tadpoles exposed to carbon nanofibers at concentrations of 1 and 10 mg/L, respectively ( $n = 10$  tadpoles/group).

327

328 Finally, we observed the accumulation of nanomaterials in tadpoles belonging to groups  
329 CNF-I and CNF-II - this finding was inferred based on TOC concentrations (Figure 10A) and on  
330 animals' visual evaluation (Figure 10B-C) - with concentration-response effect. We noticed  
331 significant CNF accumulation in animals' gastrointestinal tract; it prevailed in the ones exposed to  
332 the highest CNF concentration (10 mg/L). These data have confirmed that CNFs were ingested by  
333 tadpoles; the statistical analyses have shown significant correlation among the accumulation of

334 these nanomaterials, different biomarkers predictive of oxidative stress (ROS and TBARS),  
335 antioxidant activity (SOD and CAT), as well as cytotoxic (viable, apoptotic, and necrotic  
336 erythrocytes) and neurotoxic effect (number of neuroblasts in tadpoles, as well as AChE and BChE  
337 activity in these models) (Table 1).  
338

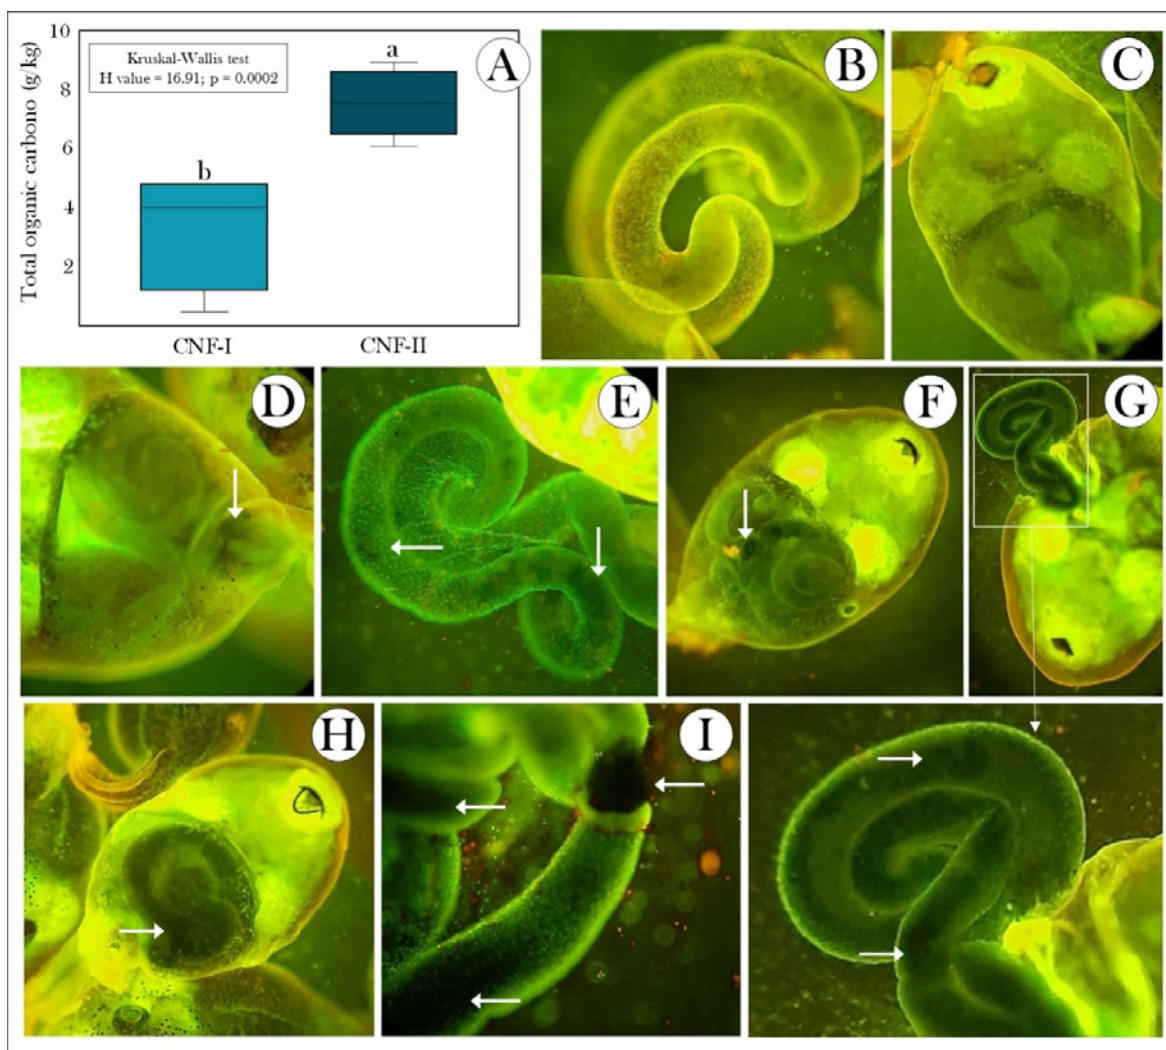

**Figure 10.** Boxplot of (A) total organic carbon concentration and (B-I) representative images of *P. cuvieri* tadpoles exposed, or not, to different CNF concentrations. “A”, the summary of the statistical analysis is shown in the upper left corner of the figure. Different lowercase letters indicate significant differences between experimental groups. Background TOC concentrations in tadpoles in the control group were detected and subtracted from that of CNFs-exposed samples. (B-C): representative images of *P. cuvieri* tadpoles not exposed to CNFs, (D-F) images of animals exposed to the lowest (1 mg / L) and (G-I) highest concentrations (10 mg / L) of the pollutant. CNF-I and CNF-II groups: tadpoles exposed to carbon nanofibers at concentrations of 1 and 10 mg/L, respectively. Representative images of n = 9 tadpoles/group. “A”, data about n = 16/group,

8 samples, composed of a pool of two animals/each. Arrows indicate CNF accumulation in animals.

339

340

#### 341 4. DISCUSSION

342 Identifying and featuring the effect of organisms' exposure to different pollutants and  
343 contaminants are essential procedures to assess ecotoxicological risks associated with environmental  
344 pollution (Eason & O'Halloran, 2002; O'Halloran, 2006; Rand, 2020). Furthermore, the  
345 aforementioned studies can generate important subsidies for further remediation/mitigation  
346 measures to prevent the occurrence of lethal effects on the herein assessed animals (Madar et al.,  
347 2020; Wang et al., 2020). Accordingly, our study was the first to show how CNFs can have impact  
348 on the health of anurofauna. This finding reinforces the toxicological potential of these  
349 nanomaterials inferred through tests carried out *in vitro* and *in vivo* with organisms from other  
350 taxonomic groups (Magrez et al., 2006; Brown et al., 2007; Jensen et al., 2012; DeLorme et al.,  
351 2012; Jensen et al., 2012; Lee et al., 2015; Kalman et al., 2019; Warheit, 2019).

352 The herein evidenced significant reduction in total soluble carbohydrate, total protein and  
353 triglyceride concentrations in *P. cuvieri* tadpoles exposed to CNFs (Figure 3) and to other types of  
354 pollutants (e.g.: atrazine: Dornelles & Oliveira, 2014; glyphosate: Dornelles & Oliveira, 2016;  
355 quinclorac: Dornelles & Oliveira, 2014; basudin: Ezemonye & Ilechie, 2007; naphthenic acids:  
356 Melvin et al., 2013; polycyclic aromatic hydrocarbons: Gendron et al., 1994, among others) has  
357 proven that CNFs can have impact on the energy metabolism of these models. Therefore, our  
358 results have suggested the direct or indirect activation of metabolic pathways related to  
359 glycogenolysis, proteolysis and lipolysis by CNFs. In this case, assumingly, the high energy  
360 consumption demanded by physiological processes of antioxidant defense, whose association was  
361 previously discussed (Strong et al., 2017) can explain the lower concentrations of the assessed  
362 macromolecules. Therefore, it is possible stating that CNF accumulation in animals' gastrointestinal  
363 system (Figure 9) was affected by nutrient absorption either by space occupation in the intestinal  
364 lumen [like reports involving microplastic consumption by tadpoles (Araújo et al., 2020a)] or by its  
365 negative effects on intestinal absorptive cells or on tadpoles' hepatic system. We could rule out the  
366 hypothesis that CNF accumulation in tadpoles' gastrointestinal tract itself can trigger physiological  
367 mechanisms capable of diminishing these models' food capture motivation, as also proposed by  
368 Araújo & Malafaia (2020). The false satiety feeling of the animals can reduce carbohydrate, lipid,  
369 and tissue protein rates in tadpoles' bodies. In any case, nutritional deficits can have broader  
370 ecological consequences in tadpoles, regardless of the physiological mechanisms altered during

371 exposure to CNFs, since the diverting energy from other processes, such as growth and  
372 development, to maintain physiological homeostasis, often has negative effect on these animals'  
373 health.

374 On the other hand, our data have evidenced CNFs' ability to induce oxidative stress  
375 increase, which was inferred based on ROS, H<sub>2</sub>O<sub>2</sub> and TBARS concentrations (Figure 4) - SOD and  
376 catalase activation (Figure 5) was not enough to maintain homeostasis REDOX in tadpoles exposed  
377 to the tested nanomaterials. Although the literature about studies involving amphibians' exposure  
378 to any CN carried out *in vivo* is scarce, our data have corroborated results in reports by Sari et al.  
379 (2014). These authors reported that increased H<sub>2</sub>O<sub>2</sub>, glutathione reductase, SOD and catalase rates  
380 in tadpoles belonging to species *Xenopus leavis* were exposure-time (2, 4, 8, 12 and 24 h) and  
381 MWCNT- (0.1, 1 and 10 mg/L) dependent.

382 From the biochemical viewpoint, the most important enzymatic pathways for antioxidant  
383 defense against ROS are those involving SOD, since they convert the superoxide anion radical (O<sub>2</sub><sup>-</sup>)  
384 into H<sub>2</sub>O<sub>2</sub>, and catalase, which converts H<sub>2</sub>O<sub>2</sub> into H<sub>2</sub>O molecules and O<sub>2</sub> (Lee et al., 2018; Ransy  
385 et al., 2020; Damiano et al., 2020). Based on such an information, it is tempting to speculate that  
386 the increased oxidative stress observed in our study can be explained by different responses to CNFs.  
387 One possibility for this statement could be related to the negative effect of CNFs on catalases'  
388 molecular structure, because it decreases catalases' enzymatic efficiency or influences its affinity with  
389 the substrate. It is so because H<sub>2</sub>O<sub>2</sub> molecules formed through SOD activity would not be  
390 neutralized by catalase, although its activity increases in animals exposed to CNFs. In this case, even  
391 greater increase would be necessary to balance SOD and catalase activity. However, assumingly,  
392 H<sub>2</sub>O<sub>2</sub> is released as the product from other metabolic routes [see review by Hernandez et al. (2012)],  
393 catalyzed by enzymes, such as alcohol (Siebum et al., 2006; Ferreira et al., 2010; Turner, 2011),  
394 glucose (Zhou et al., 2010; Wang et al., 2011), galactose (Siebum et al., 2006; Turner et al., 2011),  
395 lactate (Gao et al., 2011), glycolate (Das et al., 2010), cholesterol (Pollegioni et al., 2009; Saxena et  
396 al., 2011), L-amino acid (Schrittewieser et al., 2011), D-aminoacid (Pollegioni & Molla, 2011) and  
397 monoamine oxidase (Buto et al., 1994; Edmondson et al., 2014). It is also plausible assuming that  
398 high ROS production in tadpoles in the CNF-I and CNF-II groups is associated with inflammasomes  
399 activation [intracellular multiprotein complexes activating caspases] by nanomaterials, whose  
400 reactive species formed in these systems are part of biochemical signaling reactions that can also  
401 activate inflammation through the production of several pro-inflammatory cytokines [see more  
402 details in Tschopp & Schroder (2010)]. Increased TBARS, mainly in the CNF-II group (Figure 4),  
403 suggested lipoperoxidation oxidative stress induced by CNFs, whose changes in biological  
404 membranes can further intensify ROS production (Itri et al., 2014).

405 Nevertheless, oxidative stress increase can cause different physiological consequences in  
406 organisms, such as increase in apoptotic and necrotic processes, as observed in our study (Figure 6).  
407 These data are particularly interesting, since they corroborate other studies that have already shown  
408 the induction of cell death processes in different model systems exposed to CNFs (either *in vitro* or  
409 *in vivo*). This finding is indicative of nanomaterials activating apoptotic and necrotic pathways  
410 through different pathways (Bottini et al., 2006; Elgrabli et al., 2008; Ravichandran et al., 2009;  
411 Patlolla et al., 2010; Srivastava et al., 2011; Wang et al., 2012; Kim et al., 2014; Salehchah et al.,  
412 2020). Furthermore, data in our study also suggested that the increased rate of apoptotic and  
413 necrotic erythrocytes may have happened because of damages to cell membranes caused by direct  
414 contact of these models with CNFs or by increased oxidative stress, which was inferred through  
415 different biomarkers (H<sub>2</sub>O<sub>2</sub>, ROS and TBARS). However, assumingly, CNFs induced increased  
416 expression of apoptosis genes (as demonstrated by Lee et al (2015)), mitochondrial membrane  
417 potential collapse (as suggested by Salehchah et al. (2020)), DNA damage [ whose plausibility has  
418 already been demonstrated by Li et al. (2005) and Zhu et al. (2007)], and caspase activation [as  
419 suggested by Sohaebuddin et al. (2010)]. Shen et al. (2010) and Wang et al. (2012) have reported  
420 that CNs can cause, Ca<sup>2+</sup> + homeostasis imbalance and mitochondrial damage, as well as oxidative  
421 stress. These factors can be involved in MWCNTs-induced apoptosis and activate the production of  
422 the tumor necrosis factor by activating macrophages and monocytes, whose association with  
423 apoptosis and necrosis induction is well documented (Laster et al., 1988; Larrick & Wright, 1990;  
424 Van-Herreweghe et al., 2010; Ni et al., 2016; Yao & Cadwell, 2020; Liu & Jiao, 2020).

425 Interestingly, we also noticed neurotoxic effect on tadpoles exposed to CNFs, and this  
426 finding was mainly inferred through increased AChE and BChE activity (Figure 7). BChE played  
427 important role in supporting AChE in cholinergic transmission regulation, mainly in the absence of  
428 AChE (Li et al., 2000). However, these data are different from those reported in previous studies,  
429 such as those by Wang et al. (2007), Wang et al. (2009) and Cabral et al. (2013). Wang et al.  
430 (2009) and Cabral et al. (2013) reported that the anticholinesterase action of CNTs can be related  
431 to different action mechanisms, including the ones related to these nanomaterials' ability to adsorb  
432 AChE, to compete with AChE for its substrate and even to reduce the higher reaction speed ( $V_{max}$ )  
433 of this enzyme due to the substrate's inability to reach the active site of the enzyme by immobilizing  
434 the nanomaterials. Wang et al. (2007) suggested that high BChE adsorption by the tested CNs  
435 promoted structural and functional changes that have led to significant reduction in enzyme  
436 activity.

437 Our data is following the study by Ibrahim et al. (2013), according to which, the direct effect  
438 of CNs on AChE activity did not cause significant change in the association and catalysis

439 mechanism was observed. According to these authors, the catalytic constant increased as the  
440 Michaelis constant slightly decreased, and this finding is indicative of enzyme efficiency increase due  
441 to increased substrate affinity with the active site. The thermodynamic data of the enzyme's  
442 activation mechanisms showed no change in substrate interaction mechanism with the anionic  
443 binding site. Therefore, assumingly, similar mechanism could explain the AChE and BChE increase  
444 identified in tadpoles exposed to CNFs. Therefore, it is possible that the activation of these enzymes  
445 took place due to the indirect effects of CNFs rather than to the aforementioned process. Studies  
446 carried out *in vitro* have already shown that H<sub>2</sub>O<sub>2</sub> strongly increased the AChE activity (Schallreuter  
447 et al., 2004; Garcimartín et al., 2017), and it reinforces the hypothesis that the high production of  
448 this reactive oxygen species has also stimulated the cholinesterase activity. It is plausible supposing  
449 interactions between CNFs and acetylcholine receptors, and that such interactions led to increased  
450 AChE and BChE synthesis for the decomposition of higher levels of this neurotransmitter. The  
451 hypothesis that the stimulatory effect of CNFs on the activity of these enzymes has been associated  
452 with positive regulation of the AChE and BChE genes due to the inhibitory effect of nanomaterials,  
453 but it needs to be tested in future studies.

454 We also observed that the exposure to CNFs seems to have affected populations of  
455 neuromats living in some regions of tadpoles' bodies, although in a different way. These cells are  
456 found in different amphibian species (Russel, 1976; Krupa et al., 2020) and make up a  
457 mechanosensory lateral line system with hair cells sensitive to movement, vibrations, and pressure  
458 gradients in the surrounding water (Lannoo, 1999). These cells are similar in morphology and  
459 function to hair cells in the auditory and vestibular system of other vertebrates (Mogdans, 2019;  
460 Roberts et al., 1988). Small movements in the water move the hair bundles of neuromast hair cells,  
461 and it mechanically opens the blocked ion channels (Harris et al., 1970; Sand et al., 1975). Hair  
462 cells (inside the neuromasts) depolarize and release neurotransmitters to the afferent neuronal  
463 terminals after water-flow deflection. These terminals transmit this information to the posterior  
464 brain (Jung et al., 2020).

465 Animals exposed to nanomaterials had fewer neuromast in their head (anterior) and a larger  
466 number of them in their caudal (posterior) region (Figure 8). This finding suggested differentiated  
467 action by CNFs, and it could have had important biological consequences in the evaluated animals.  
468 Neuromats in the head (be it in amphibians or in fish) are sensitive to surface wave movements in  
469 water, to detect prey, as well as present better spatial solution due to their greater density. Caudal  
470 neuromats (i.e., posterior) are more adept to detecting predators and water disorders (Russell, 1976;  
471 Schwartz & Hasler, 1996; Bleckmann & Zelick, 2009). Previous studies have also shown effect like  
472 that observed in our study, given differences between innervations of anterior and posterior



473 neuromats. Hernandez et al. (2006) exposed *Danio rerio* larvae to different copper concentrations  
474 and reported differential hair cell regeneration between neuromats in the head and body of these  
475 larvae. Neuromats in the body were unable to regenerate at concentrations higher than 3.18 mg/L,  
476 whereas neuromats in the head regenerated at copper levels up to 25.42 mg/L. Similarly, posterior  
477 neuromats were more sensitive in *D. rerio* embryos exposed to caffeine, dichlorvos, 4-nonylphenol  
478 and perfluorooctane sulfonic acid (Stengel et al. 2017). Posterior neuromats were more affected by  
479 copper sulphate and neomycin than previous neuromats in the aforementioned species after 30-min  
480 and 96-h exposure. Anterior neuromats exhibited greater cellular damage (Stengel et al. 2017). In  
481 this case, similarly to these findings, our data suggested differentiated action of CNFs on neuromats  
482 evaluated in the anterior and posterior regions of *P. cuvieri* tadpoles.

483         Although the action mechanisms of CNFs have not been explored in-depth in our study, it is  
484 tempting to speculate that these nanomaterials have acted in in neuromast populations through  
485 different ways. Assumably, CNFs have affected these cells by competing with calcium ions at the  
486 fixation sites, and this process has avoided the flow of ions necessary for signal transduction, as  
487 observed by Hudspeth (1983) and Faucher et al. (2006). Thus, damage could be reversible. On the  
488 other hand, the reduced number of neuromats observed in the head of tadpoles exposed to CNFs  
489 can correspond to permanent damage to these cells because of increased oxidative stress, necrosis,  
490 or apoptosis. This hypothesis is supported by results of correlation analyses carried out between the  
491 number of neuromats in the head and CNF accumulation in the tested animals (see Table 1), as  
492 well as by reports by Olivari et al. (2008), who suggested similar mechanisms to explain the reduced  
493 number of neuromats in *D. rerio* larvae exposed to different copper concentrations. On the other  
494 hand, the increased number of neuromats observed in groups exposed to CNFs can be a  
495 physiological compensation mechanism to balance damages caused by nanomaterials to head cells,  
496 since the total number of neuromats did not differ between experimental groups (Figure 8C).

497

## 498 5. CONCLUSION

499         Based on the information above, our study confirmed the initial hypotheses and  
500 demonstrated that CNFs can accumulate in animals and have negative effects on the health of *P.*  
501 *cuvieri* tadpoles, even at short-term exposure, at environmentally relevant concentrations. The  
502 induction of nutritional deficit, oxidative stress and cyto-and neurotoxic effects are factors affecting  
503 these animals' growth and development. However, it is necessary accepting that our results are only  
504 the “tip of the iceberg”; therefore, it is essential conducting further investigations to evaluate the  
505 biological impacts of CNFs on anurofauna. Limitations of our study are the starting point for future  
506 research. It is interesting further evaluating the long-term CBF's effects and their impact on other



507 physiological functions of the assessed model, as well as identifying and featuring possible damages  
508 caused by it in other amphibian species. This finding will be especially important to expand our  
509 knowledge about the action mechanisms of these pollutants. This information will be an important  
510 basis to assess ecotoxicological risks associated with the presence and dispersion of these pollutants  
511 in freshwater ecosystems and, their impact on anurofauna.

512

## 513 **6. ACKNOWLEDGMENT**

514 The authors are grateful to the Brazilian National Research Council (CNPq) (Brazilian  
515 research agency) (proc. N. 426531/2018-3) and to *Instituto Federal Goiano* for the financial support  
516 (Proc. N. 23219.000002.2021-81). The authors also acknowledge *Laboratório Multiusuário de*  
517 *Microscopia de Alta Resolução* (LabMic) (*Universidade Federal de Goiás/Brazil*) for their collaboration  
518 to the CNFs featuring process. Malafaia G. holds productivity scholarship granted by CNPq (proc.  
519 n. 307743/2018-7).

520

## 521 **7. COMPLIANCE WITH ETHICAL STANDARDS**

522 **Conflict of interest:** The authors declare no conflict of interest.

523 **Ethical approval:** All experimental procedures were carried out in compliance with ethical  
524 guidelines on animal experimentation. Meticulous efforts were made to assure that animals suffered  
525 the least possible and to reduce external sources of stress, pain and discomfort. The current study  
526 did not exceed the number of animals necessary to produce trustworthy scientific data. This article  
527 does not refer to any study with human participants performed by any of the authors.

528

## 529 **8. REFERENCES**

- 530 Abdo, H. S., Khalil, K. A., El-Rayes, M. M., Marzouk, W. W., Hashem, A. F. M., & Abdel-Jaber, G.  
531 T. (2020). Ceramic nanofibers versus carbon nanofibers as a reinforcement for magnesium  
532 metal matrix to improve the mechanical properties. *Journal of King Saud University-*  
533 *Engineering Sciences*, 32(5), 346-350.
- 534 Kasibhatla, S., Amarante-Mendes, G. P., Finucane, D., Brunner, T., Bossy-Wetzel, E., & Green, D.  
535 R. (2006). Acridine orange/ethidium bromide (AO/EB) staining to detect apoptosis. *Cold*  
536 *Spring Harbor Protocols*, 2006(3), pdb-prot4493.
- 537 Araújo, A. P. C., & Malafaia, G. (2020). Can short exposure to polyethylene microplastics change  
538 tadpoles' behavior? A study conducted with neotropical tadpole species belonging to order  
539 anura (*Physalaemus cuvieri*). *Journal of Hazardous Materials*, 391, 122214.

- 540 Araújo, A. P. C., de Melo, N. F. S., de Oliveira Junior, A. G., Rodrigues, F. P., Fernandes, T., de Andrade  
541 Vieira, J. E., ... & Malafaia, G. (2020a). How much are microplastics harmful to the health of  
542 amphibians? A study with pristine polyethylene microplastics and *Physalaemus cuvieri*. *Journal of*  
543 *hazardous materials*, 382, 121066.
- 544 Araújo, A. P. C., Gomes, A. R., & Malafaia, G. (2020b). Hepatotoxicity of pristine polyethylene  
545 microplastics in neotropical *physalaemus cuvieri* tadpoles (Fitzinger, 1826). *Journal of Hazardous*  
546 *Materials*, 386, 121992.
- 547 Aziz, Z. A. A., Mohd-Nasir, H., Mohd Setapar, S. H., Peng, W. L., Chuo, S. C., Khatoon, A., ... &  
548 Ahmad, A. (2019). Role of nanotechnology for design and development of cosmeceutical:  
549 application in makeup and skin care. *Frontiers in Chemistry*, 7, 739.
- 550 Benedict's qualitative glucose reagent as a biuret reagent. *Anal. Chem.* v.29, p.1491-1495, 1957.
- 551 Bhagyaraj, S. M., & Oluwafemi, O. S. (2018). Nanotechnology: the science of the invisible. In  
552 *Synthesis of inorganic nanomaterials* (pp. 1-18). Woodhead Publishing.
- 553 Bharatraj, D. K., & Yathapu, S. R. (2018). Nutrition-pollution interaction: An emerging research area. *The*  
554 *Indian journal of medical research*, 148(6), 697.
- 555 Bleckmann H, Zelick R (2009) Lateral line system of fish. *Integrative Zool* 4:13–25.
- 556 Bottini, M., Bruckner, S., Nika, K., Bottini, N., Bellucci, S., Magrini, A., ... & Mustelin, T. (2006).  
557 Multi-walled carbon nanotubes induce T lymphocyte apoptosis. *Toxicology letters*, 160(2),  
558 121-126.
- 559 Bourdiol, F., Mouchet, F., Perrault, A., Fourquaux, I., Datas, L., Gancet, C., ... & Flahaut, E. (2013).  
560 Biocompatible polymer-assisted dispersion of multi walled carbon nanotubes in water, application to  
561 the investigation of their ecotoxicity using *Xenopus laevis* amphibian larvae. *Carbon*, 54, 175-191.
- 562 Bryan, N. S., & Grisham, M. B. (2007). Methods to detect nitric oxide and its metabolites in  
563 biological samples. *Free Radical Biology and Medicine*, 43(5), 645-657.
- 564 Buto, S., Pollegioni, L., D'Angiuro, L., & Pilone, M. S. (1994). Evaluation of d- $\alpha$  amino acid oxidase  
565 from *Rhodotorula gracilis* for the production of  $\alpha$ -keto acids: a reactor system. *Biotechnology*  
566 *and bioengineering*, 44(11), 1288-1294.
- 567 Chang, X. L., Ruan, L., Yang, S. T., Sun, B., Guo, C., Zhou, L., ... & Yang, M. (2014). Quantification of  
568 carbon nanomaterials in vivo: direct stable isotope labeling on the skeleton of fullerene C 60.  
569 *Environmental Science: Nano*, 1(1), 64-70.
- 570 Chaudhary, P., Fatima, F., & Kumar, A. (2020). Relevance of nanomaterials in food packaging and  
571 its advanced future prospects. *Journal of Inorganic and Organometallic Polymers and*  
572 *Materials*, 30(12), 5180-5192.
- 573 Conte, G., Stelitano, S., Policicchio, A., Minuto, F. D., Lazzaroli, V., Galiano, F., & Agostino, R. G.  
574 (2020). Assessment of activated carbon fibers from commercial Kevlar® as nanostructured

- 575 material for gas storage: Effect of activation procedure and adsorption of CO<sub>2</sub> and CH<sub>4</sub>.  
576 *Journal of Analytical and Applied Pyrolysis*, 152, 104974.
- 577 Cui, H., Kalinin, S. V., Yang, X., & Lowndes, D. H. (2004). Growth of carbon nanofibers on tipless  
578 cantilevers for high resolution topography and magnetic force imaging. *Nano Letters*, 4(11),  
579 2157-2161.
- 580 Damiano, S., Sozio, C., La Rosa, G., Guida, B., Faraonio, R., Santillo, M., & Mondola, P. (2020).  
581 Metabolism Regulation and Redox State: Insight into the Role of Superoxide Dismutase 1.  
582 *International Journal of Molecular Sciences*, 21(18), 6606.
- 583 Das, C., Paul, S. S., Saha, A., Singh, T., Saha, A., Im, J., & Biswas, G. (2020). Silver-Based  
584 Nanomaterials as Therapeutic Agents Against Coronaviruses: A Review. *International*  
585 *journal of nanomedicine*, 15, 9301.
- 586 Das, S., Glenn IV, J. H., & Subramanian, M. (2010). Enantioselective oxidation of 2-hydroxy  
587 carboxylic acids by glycolate oxidase and catalase coexpressed in methylotrophic *Pichia*  
588 *pastoris*. *Biotechnology progress*, 26(3), 607-615.
- 589 Dashty, M. (2013). A quick look at biochemistry: carbohydrate metabolism. *Clinical biochemistry*,  
590 46(15), 1339-1352.
- 591 De Leon, J. A. D., & Borges, C. R. (2020). Evaluation of Oxidative Stress in Biological Samples  
592 Using the Thiobarbituric Acid Reactive Substances Assay. *JoVE (Journal of Visualized*  
593 *Experiments)*, (159), e61122.
- 594 Del-Maestro, R. F., & McDonald, W. (1985). Oxidative enzymes in tissue homogenates. *Handbook of*  
595 *methods for oxygen radical research*, 291-296.
- 596 De-Oliveira-Miranda, N. E., Maciel, N. M., Lima-Ribeiro, M. S., Colli, G. R., Haddad, C. F. B., &  
597 Collevatti, R. G. (2019). Diversification of the widespread neotropical frog *Physalaemus*  
598 *cuvieri* in response to Neogene-Quaternary geological events and climate dynamics.  
599 *Molecular Phylogenetics and Evolution*, 132, 67-80.
- 600 Din, I. U., Shaharun, M. S., Naeem, A., Alotaibi, M. A., Alharthi, A. I., Bakht, M. A., & Nasir, Q.  
601 (2020). Carbon nanofibers as potential materials for catalysts support, a mini-review on recent  
602 advances and future perspective. *Ceramics International*.
- 603 Dornelles, M. F., & Oliveira, G. T. (2014). Effect of atrazine, glyphosate and quinclorac on  
604 biochemical parameters, lipid peroxidation and survival in bullfrog tadpoles (*Lithobates*  
605 *catesbeianus*). *Archives of Environmental Contamination and Toxicology*, 66(3), 415-429.
- 606 Dornelles, M. F., & Oliveira, G. T. (2016). Toxicity of atrazine, glyphosate, and quinclorac in  
607 bullfrog tadpoles exposed to concentrations below legal limits. *Environmental Science and*  
608 *Pollution Research*, 23(2), 1610-1620.

- 609 Eason, C., & O'Halloran, K. (2002). Biomarkers in toxicology versus ecological risk assessment.  
610 Toxicology, 181, 517-521.
- 611 Edmondson, D. (2014). Hydrogen peroxide produced by mitochondrial monoamine oxidase  
612 catalysis: biological implications. *Current Pharmaceutical Design*, 20(2), 155-160.
- 613 Elgrabli, D., Abella-Gallart, S., Robidel, F., Rogerieux, F., Boczkowski, J., & Lacroix, G. (2008).  
614 Induction of apoptosis and absence of inflammation in rat lung after intratracheal instillation  
615 of multiwalled carbon nanotubes. *Toxicology*, 253(1-3), 131-136.
- 616 Ellman, G. L., Courtney, K. D., Andres Jr, V., & Featherstone, R. M. (1961). A new and rapid  
617 colorimetric determination of acetylcholinesterase activity. *Biochemical pharmacology*, 7(2),  
618 88-95.
- 619 Elnemma, E. M. (2004). Spectrophotometric determination of hydrogen peroxide by a hydroquinone-aniline  
620 system catalyzed by molybdate. *Bulletin of the Korean Chemical Society*, 25(1), 127-129.
- 621 Estrela, F. N., Guimarães, A. T. B., Silva, F. G., da Luz, T. M., Silva, A. M., Pereira, P. S., & Malafaia, G.  
622 (2021). Effects of polystyrene nanoplastics on *Ctenopharyngodon idella* (grass carp) after individual  
623 and combined exposure with zinc oxide nanoparticles. *Journal of Hazardous Materials*, 403, 123879.
- 624 Ezemonye, L. I. N., & Ilechie, I. (2007). Acute and chronic effects of organophosphate pesticides  
625 (Basudin) to amphibian tadpoles (*Ptychadena bibroni*). *African Journal of Biotechnology*,  
626 6(13).
- 627 Fabian, F. L. (2019). Advantages and Drawbacks of the Nanotechnology and Biotechnology toward  
628 Shaping a Global Sustainable Development. *Biosciences Biotechnology Research Asia*, 16(4),  
629 693-695.
- 630 Ferreira, P., Hernández-Ortega, A., Herguedas, B., Rencoret, J., Gutierrez, A., Martínez, M. J., ... &  
631 Martínez, Á. T. (2010). Kinetic and chemical characterization of aldehyde oxidation by fungal  
632 aryl-alcohol oxidase. *Biochemical Journal*, 425(3), 585-593.
- 633 Firoozi, A. A., Naji, M., Dithinde, M., & Firoozi, A. A. (2020). A Review: Influence of Potential  
634 Nanomaterials for Civil Engineering Projects. *Iranian Journal of Science and Technology*,  
635 *Transactions of Civil Engineering*, 1-12.
- 636 Freixa, A., Acuña, V., Sanchís, J., Farré, M., Barceló, D., & Sabater, S. (2018). Ecotoxicological  
637 effects of carbon based nanomaterials in aquatic organisms. *Science of the Total Environment*,  
638 619, 328-337.
- 639 Frost DR. Amphibian Species of the World: an Online Reference. Version 6.0. Available in:  
640 <http://research.amnh.org/vz/herpetology/amphibia/>. Access on: 11 march. 2017.
- 641 Fytianos, G., Rahdar, A., & Kyzas, G. Z. (2020). Nanomaterials in Cosmetics: Recent Updates.  
642 *Nanomaterials*, 10(5), 979.

- 643 Gao, C., Zhang, W., Ma, C., Liu, P., & Xu, P. (2011). Kinetic resolution of 2-hydroxybutanoate  
644 racemic mixtures by NAD-independent L-lactate dehydrogenase. *Bioresource technology*,  
645 102(7), 4595-4599.
- 646 Gendron, A. D., Bishop, C. A., Fortin, R., & Hontela, A. (1997). In vivo testing of the functional  
647 integrity of the corticosterone-producing axis in mudpuppy (amphibia) exposed to  
648 chlorinated hydrocarbons in the wild. *Environmental Toxicology and Chemistry: An*  
649 *International Journal*, 16(8), 1694-1706.
- 650 Gomes, A. R., Chagas, T. Q., Silva, A. M., de Lima Rodrigues, A. S., da Luz, T. M., de Andrade Vieira, J. E.,  
651 & Malafaia, G. (2021). Trophic transfer of carbon nanofibers among eisenia fetida, danio rerio and  
652 oreochromis niloticus and their toxicity at upper trophic level. *Chemosphere*, 263, 127657.
- 653 GORNALL, A.G.; BARDAWILL, C.J.; DAVID, M. M. Determination of serum proteins by means of the  
654 biuret reaction. *J. Biol. Chem.* v.177, p.751-766, 1949.
- 655 Gosner KL. A simplified table for staging anuran embryos and larvae with notes on identification.  
656 *Herpetologica*, 16:183-190 1960.
- 657 Goto, H., Saito, T., Teraoka, K., Murakami, S., Kitazawa, M., Ohta, R., & Tanemura, M. (2014).  
658 Biofunctionalization of carbon nanofiber tips for scanning probe microscopy using thin Au  
659 coating and immobilized biorecognition molecules. *Carbon*, 68, 638-645.
- 660 Green, D. M., Lannoo, M. J., Lesbarrères, D., & Muths, E. (2020). Amphibian population declines:  
661 30 years of progress in confronting a complex problem. *Herpetologica*, 76(2), 97-100.
- 662 Guimarães, A. T. B., Charlie-Silva, I., & Malafaia, G. (2020). TOXIC EFFECTS OF NATURALLY-AGED  
663 MICROPLASTICS ON ZEBRAFISH JUVENILES: A MORE REALISTIC APPROACH TO  
664 PLASTIC POLLUTION IN FRESHWATER ECOSYSTEMS. *Journal of Hazardous Materials*,  
665 124833.
- 666 Harris, G. G., Frishkopf, L. S., & Flock, Å. (1970). Receptor potentials from hair cells of the lateral  
667 line. *Science*, 167(3914), 76-79.
- 668 HENRY, R. J.; SOBEL, C.; BERKMAN, S. Interferences with biuret methods for serum proteins. Use of  
669 Bucolo, G., & David, H. (1973). Quantitative determination of serum triglycerides by the use of  
670 enzymes. *Clinical chemistry*, 19(5), 476-482.
- 671 Herek, J. S., Vargas, L., Trindade, S. A. R., Rutkoski, C. F., Macagnan, N., Hartmann, P. A., & Hartmann,  
672 M. T. (2020). Can environmental concentrations of glyphosate affect survival and cause malformation  
673 in amphibians? Effects from a glyphosate-based herbicide on *Physalaemus cuvieri* and *P. gracilis*  
674 (*Anura: Leptodactylidae*). *Environmental Science and Pollution Research*, 1-12.
- 675 Hernandez PP, Moreno V, Olivari FA, Allende ML (2006) Sub-lethal concentrations of waterborne  
676 copper are toxic to lateral line neuromasts in zebrafish (*Danio rerio*). *Hear Res* 213:1-10

- 677 Hernandez, K., Berenguer-Murcia, A., C Rodrigues, R., & Fernandez-Lafuente, R. (2012).  
678 Hydrogen peroxide in biocatalysis. A dangerous liaison. *Current Organic Chemistry*, 16(22),  
679 2652-2672.
- 680 Hocking, D. J., & Babbitt, K. J. (2014). Amphibian contributions to ecosystem services.  
681 *Herpetological conservation and biology*.
- 682 Ighodaro, O. M., & Akinloye, O. A. (2018). First line defence antioxidants-superoxide dismutase (SOD),  
683 catalase (CAT) and glutathione peroxidase (GPX): Their fundamental role in the entire antioxidant  
684 defence grid. *Alexandria journal of medicine*, 54(4), 287-293.
- 685 International Union for Conservation of Nature (IUCN). Red List of Threatened Species 2020.  
686 <https://www.iucnredlist.org/search?query=Physalaemus%20cuvieri&searchType=species>.  
687 Access on: 30 Dec. 2020.
- 688 Itri, R., Junqueira, H. C., Mertins, O., & Baptista, M. S. (2014). Membrane changes under oxidative  
689 stress: the impact of oxidized lipids. *Biophysical reviews*, 6(1), 47-61.
- 690 Jaworski, K., Sarkadi-Nagy, E., Duncan, R. E., Ahmadian, M., & Sul, H. S. (2007). Regulation of  
691 triglyceride metabolism. IV. Hormonal regulation of lipolysis in adipose tissue. *American*  
692 *Journal of Physiology-Gastrointestinal and Liver Physiology*, 293(1), G1-G4.
- 693 Jung, J., Serrano-Rojas, S. J., & Warkentin, K. M. (2020). Multimodal mechanosensing enables  
694 treefrog embryos to escape egg-predators. *Journal of Experimental Biology*, 223(24).
- 695 Kaul, S., Gulati, N., Verma, D., Mukherjee, S., & Nagaich, U. (2018). Role of nanotechnology in  
696 cosmeceuticals: a review of recent advances. *Journal of pharmaceutics*, 2018.
- 697 Keller, A. A., Vosti, W., Wang, H., & Lazareva, A. (2014). Release of engineered nanomaterials  
698 from personal care products throughout their life cycle. *Journal of nanoparticle research*,  
699 16(7), 2489.
- 700 Khan, F. R., Syberg, K., Shashoua, Y., & Bury, N. R. (2015). Influence of polyethylene microplastic beads on  
701 the uptake and localization of silver in zebrafish (*Danio rerio*). *Environmental pollution*, 206, 73-79.
- 702 Kim, K. H., Yeon, S. M., Kim, H. G., Lee, H., Kim, S. K., Han, S. H., ... & Yuk, S. H. (2014).  
703 Single-walled carbon nanotubes induce cell death and transcription of TNF- $\alpha$  in macrophages  
704 without affecting nitric oxide production. *Inflammation*, 37(1), 44-54.
- 705 Krupa, P. M., McMurry, S. T., Minghetti, M., & Belden, J. B. (2020). Effects of Copper on the  
706 Neuromasts of *Xenopus Laevis*. *Archives of Environmental Contamination and Toxicology*, 1-  
707 10.
- 708 Kumar, R., Aadil, K. R., Ranjan, S., & Kumar, V. B. (2020). Advances of nanotechnology and  
709 nanomaterials based strategies for neural tissue engineering. *Journal of Drug Delivery Science*  
710 *and Technology*, 101617.

- 711 Lake, C. L., & Lake, P. D. (2014). Carbon Nanofiber Multifunctional Mat. In Nanotube Superfiber  
712 Materials (pp. 313-331). William Andrew Publishing.
- 713 Lannoo, M. J. (1999). Integration: nervous and sensory systems. In Tadpoles: The Biology of  
714 Anuran Larvae (ed. McDiarmid, R. and Altig, R.), pp. 149–169. Chicago, IL: University of  
715 Chicago Press.
- 716 Larrick, J. W., & Wright, S. C. (1990). Cytotoxic mechanism of tumor necrosis factor  $\alpha$ . The  
717 FASEB Journal, 4(14), 3215-3223.
- 718 Laster, S. M., Wood, J. G., & Gooding, L. R. (1988). Tumor necrosis factor can induce both apoptic  
719 and necrotic forms of cell lysis. The Journal of Immunology, 141(8), 2629-2634.
- 720 Lee, J. N., Dutta, R. K., Maharjan, Y., Liu, Z. Q., Lim, J. Y., Kim, S. J., ... & Park, R. (2018).  
721 Catalase inhibition induces pexophagy through ROS accumulation. Biochemical and  
722 biophysical research communications, 501(3), 696-702.
- 723 Lee, J. W., Choi, Y. C., Kim, R., & Lee, S. K. (2015). Multiwall carbon nanotube-induced apoptosis  
724 and antioxidant gene expression in the gills, liver, and intestine of *Oryzias latipes*. BioMed  
725 research international, 2015.
- 726 Li, B., Stribley, J. A., Ticu, A., Xie, W., Schopfer, L. M., Hammond, P., ... & Lockridge, O. (2000).  
727 Abundant tissue butyrylcholinesterase and its possible function in the acetylcholinesterase  
728 knockout mouse. Journal of neurochemistry, 75(3), 1320-1331.
- 729 Li, S., He, P., Dong, J., Guo, Z., & Dai, L. (2005). DNA-directed of carbon self-assembling  
730 nanotubes. J Am Chem Soc, 127, 14-15.
- 731 Liu, Z. G., & Jiao, D. (2020). Necroptosis, tumor necrosis and tumorigenesis. Cell Stress, 4(1), 1.
- 732 Lusher, A. L., Mchugh, M., & Thompson, R. C. (2013). Occurrence of microplastics in the gastrointestinal  
733 tract of pelagic and demersal fish from the English Channel. Marine pollution bulletin, 67(1-2), 94-99.
- 734 Madear, C., Dunca, E. C., & Madear, G. (2020, December). Soil Remediation Strategies based on  
735 Risk Assessment Approach. In IOP Conference Series: Earth and Environmental Science  
736 (Vol. 609, No. 1, p. 012094). IOP Publishing.
- 737 Maharajan, K., Muthulakshmi, S., Nataraj, B., Ramesh, M., & Kadirvelu, K. (2018). Toxicity assessment of  
738 pyriproxyfen in vertebrate model zebrafish embryos (*Danio rerio*): a multi biomarker study. Aquatic  
739 Toxicology, 196, 132-145.
- 740 Martynova, E. A., & Gapparov, M. M. (2007). Energy-proteolysis and regulation of protein  
741 metabolism. Voprosy pitaniia, 76(1), 4.
- 742 Melvin, S. D., Lanctôt, C. M., Craig, P. M., Moon, T. W., Peru, K. M., Headley, J. V., & Trudeau,  
743 V. L. (2013). Effects of naphthenic acid exposure on development and liver metabolic  
744 processes in anuran tadpoles. Environmental pollution, 177, 22-27.

- 745 MIJARES, A.; RODRIGUES, M.T.; BALDO, D. *Physalaemus cuvieri*. In: IUCN 2011. IUCN Red  
746 List of Threatened Species. Version 2011.2. <[www.iucnredlist.org](http://www.iucnredlist.org)>. 2010.
- 747 Miranda NEO, Maciel NM, Ribeiro MSL, Colli GR, Haddad FB, Collevatti RG. Diversification of the  
748 widespread neotropical frog *Physalaemus cuvieri* in response to Neogene-Quaternary geological events  
749 and climate dynamics. *Molecular Phylogenetics and Evolution*, 132: 67-80, 2019.
- 750 Mogdans, J. (2019). Sensory ecology of the fish lateral line system: Morphological and physiological  
751 adaptations for the perception of hydrodynamic stimuli. *Journal of Fish Biology*, 95(1), 53-72.
- 752 Mohamed, A. (2019). Synthesis, characterization, and applications carbon nanofibers. In *Carbon-*  
753 *based nanofillers and their rubber nanocomposites* (pp. 243-257). Elsevier.
- 754 Mohr C, Gomer P (1996) Innervation patterns of the lateral line stitches of the clawed frog,  
755 *Xenopus laevis*, and their reorganization during metamorphosis. *Brain Behav Evol* 48(2):55–  
756 69
- 757 Montalvão, M. F., Guimarães, A. T. B., de Lima Rodrigues, A. S., & Malafaia, G. (2021). Carbon  
758 nanofibers are bioaccumulated in *Aphylla williamsoni* (Odonata) larvae and cause REDOX  
759 imbalance and changes of acetylcholinesterase activity. *Science of The Total Environment*,  
760 143991.
- 761 Mouchet F, Landois P, Pinelli E, Flahaut E, Gauthier L: Carbon nanotubes in the environment and their  
762 potential ecotoxicity: Context and state of the art. *Ecotoxicité des nanotubes de carbone dans*  
763 *l'environnement : contexte et état de l'art. Env. Risques & Santé* 8(1), 47–55 (2009).
- 764 Mouchet, F., Landois, P., Datsyuk, V., Puech, P., Pinelli, E., Flahaut, E., & Gauthier, L. (2011). International  
765 amphibian micronucleus standardized procedure (ISO 21427-1) for in vivo evaluation of double-walled  
766 carbon nanotubes toxicity and genotoxicity in water. *Environmental toxicology*, 26(2), 136-145.
- 767 Mouchet, F., Landois, P., Flahaut, E., Pinelli, E., & Gauthier, L. (2007). Assessment of the potential in vivo  
768 ecotoxicity of double-walled carbon nanotubes (DWNTs) in water, using the amphibian *Ambystoma*  
769 *mexicanum*. *Nanotoxicology*, 1(2), 149-156.
- 770 Mouchet, F., Landois, P., Puech, P., Pinelli, E., Flahaut, E., & Gauthier, L. (2010). Carbon nanotube  
771 ecotoxicity in amphibians: assessment of multiwalled carbon nanotubes and comparison with double-  
772 walled carbon nanotubes. *Nanomedicine*, 5(6), 963-974.
- 773 Nezhadheydari, H., Tavabe, K. R., Mirvaghefi, A., Heydari, A., & Frinsko, M. (2019). Effects of different  
774 concentrations of Fe<sub>3</sub>O<sub>4</sub>@ ZnO and Fe<sub>3</sub>O<sub>4</sub>@ CNT magnetic nanoparticles separately and in  
775 combination on aquaculture wastewater treatment. *Environmental Technology & Innovation*, 15,  
776 100414.
- 777 Ni, H. M., McGill, M. R., Chao, X., Woolbright, B. L., Jaeschke, H., & Ding, W. X. (2016). Caspase  
778 inhibition prevents tumor necrosis factor- $\alpha$ -induced apoptosis and promotes necrotic cell



- 779 death in mouse hepatocytes in vivo and in vitro. *The American journal of pathology*, 186(10),  
780 2623-2636.
- 781 O'Halloran, K. (2006). Toxicological considerations of contaminants in the terrestrial environment  
782 for ecological risk assessment. *Human and Ecological Risk Assessment*, 12(1), 74-83.
- 783 Ohkawa, H., Ohishi, N., & Yagi, K. (1979). Assay for lipid peroxides in animal tissues by  
784 thiobarbituric acid reaction. *Analytical biochemistry*, 95(2), 351-358.
- 785 Olivari FA, Hernández PP, Allende ML (2008) Acute copper exposure induces oxidative stress and  
786 cell death in lateral line hair cells of zebrafish larvae. *Brain Res* 1244:1–12
- 787 Palit, S., & Hussain, C. M. (2020). Functionalization of nanomaterials for industrial applications:  
788 recent and future perspectives. In *Handbook of Functionalized Nanomaterials for Industrial*  
789 *Applications* (pp. 3-14). Elsevier.
- 790 Patlolla, A., Knighten, B., & Tchounwou, P. (2010). Multi-walled carbon nanotubes induce  
791 cytotoxicity, genotoxicity and apoptosis in normal human dermal fibroblast cells. *Ethnicity &*  
792 *disease*, 20(1 Suppl 1), S1.
- 793 Petersen, E. J., Flores-Cervantes, D. X., Bucheli, T. D., Elliott, L. C., Fagan, J. A., Gogos, A., ... & Plata, D.  
794 L. (2016). Quantification of carbon nanotubes in environmental matrices: current capabilities, case  
795 studies, and future prospects. *Environmental science & technology*, 50(9), 4587-4605.
- 796 Pollegioni, L., & Molla, G. (2011). New biotech applications from evolved D-amino acid oxidases.  
797 *Trends in biotechnology*, 29(6), 276-283.
- 798 Pollegioni, L., Piubelli, L., & Molla, G. (2009). Cholesterol oxidase: biotechnological applications.  
799 *The FEBS journal*, 276(23), 6857-6870.
- 800 Pupin, N. C., Gasparini, J. L., Bastos, R. P., Haddad, C. F., & Prado, C. (2010). Reproductive biology of an  
801 endemic *Physalaemus* of the Brazilian Atlantic forest, and the trade-off between clutch and egg size in  
802 terrestrial breeders of the *P. signifer* group. *The Herpetological Journal*, 20(3), 147-156.
- 803 Rand, G. M. (Ed.). (2020). *Fundamentals of aquatic toxicology: effects, environmental fate and risk*  
804 *assessment*. CRC press.
- 805 Ransy, C., Vaz, C., Lombès, A., & Bouillaud, F. (2020). Use of H<sub>2</sub>O<sub>2</sub> to Cause Oxidative Stress,  
806 the Catalase Issue. *International Journal of Molecular Sciences*, 21(23), 9149.
- 807 Ravichandran, P., Periyakaruppan, A., Sadanandan, B., Ramesh, V., Hall, J. C., Jejelowo, O., &  
808 Ramesh, G. T. (2009). Induction of apoptosis in rat lung epithelial cells by multiwalled carbon  
809 nanotubes. *Journal of Biochemical and Molecular Toxicology*, 23(5), 333-344.
- 810 Roberts, W. M., Howard, J., & Hudspeth, A. J. (1988). Hair cells: transduction, tuning, and  
811 transmission in the inner ear. *Annual review of cell biology*, 4(1), 63-92.

- 812 Rohman, F., Permana, H., Akhsani, F., Wangkulangkul, S., & Priambodo, B. (2020, April). The  
813 amphibians diversity as bioindicator of aquatic ecosystem at Sumber Taman, Malang, East  
814 Java. In AIP Conference Proceedings (Vol. 2231, No. 1, p. 040016). AIP Publishing LLC.
- 815 Roy, D. (2002). Amphibians as environmental sentinels. *Journal of biosciences*, 27(3), 187.
- 816 Russell, I. J. (1976). Amphibian lateral line receptors. In *Frog neurobiology* (pp. 513-550). Springer,  
817 Berlin, Heidelberg.
- 818 Rutkoski, C. F., Macagnan, N., Folador, A., Skovronski, V. J., do Amaral, A. M., Leitemperger, J. W., ... &  
819 Hartmann, M. T. (2020). Cypermethrin-and fipronil-based insecticides cause biochemical changes in  
820 *Physalaemus gracilis* tadpoles. *Environmental Science and Pollution Research*, 1-11.
- 821 Sachett, A., Bevilaqua, F., Chitolina, R., Garbinato, C., Gasparetto, H., Dal Magro, J., ... & Siebel, A. M.  
822 (2018). Ractopamine hydrochloride induces behavioral alterations and oxidative status imbalance in  
823 zebrafish. *Journal of Toxicology and Environmental Health, Part A*, 81(7), 194-201.
- 824 Salehcheh, M., Alboghobeish, S., Dehghani, M. A., & Zeidooni, L. (2020). Multi-walled carbon  
825 nanotubes induce oxidative stress, apoptosis, and dysfunction in isolated rat heart  
826 mitochondria: protective effect of naringin. *Environmental Science and Pollution Research*, 1-  
827 10.
- 828 Sand, O., Ozawa, S., & Hagiwara, S. (1975). Electrical and mechanical stimulation of hair cells in  
829 the mudpuppy. *Journal of comparative physiology*, 102(1), 13-26.
- 830 Saria, R., Mouchet, F., Perrault, A., Flahaut, E., Laplanche, C., Boutonnet, J. C., ... & Gauthier, L. (2014).  
831 Short term exposure to multi-walled carbon nanotubes induce oxidative stress and DNA damage in  
832 *Xenopus laevis* tadpoles. *Ecotoxicology and Environmental Safety*, 107, 22-29.
- 833 Saria, R., Mouchet, F., Perrault, A., Flahaut, E., Laplanche, C., Boutonnet, J. C., ... & Gauthier, L.  
834 (2014). Short term exposure to multi-walled carbon nanotubes induce oxidative stress and  
835 DNA damage in *Xenopus laevis* tadpoles. *Ecotoxicology and Environmental Safety*, 107, 22-  
836 29.
- 837 Saunier, V., Flahaut, E., Blatché, M. C., Bergaud, C., & Maziz, A. (2020). Carbon nanofiber-  
838 PEDOT composite films as novel microelectrode for neural interfaces and biosensing.  
839 *Biosensors and Bioelectronics*, 165, 112413.
- 840 Saxena, U., Chakraborty, M., & Goswami, P. (2011). Covalent immobilization of cholesterol  
841 oxidase on self-assembled gold nanoparticles for highly sensitive amperometric detection of  
842 cholesterol in real samples. *Biosensors and Bioelectronics*, 26(6), 3037-3043.
- 843 Schrittwieser, J. H., Sattler, J., Resch, V., Mutti, F. G., & Kroutil, W. (2011). Recent biocatalytic  
844 oxidation–reduction cascades. *Current Opinion in Chemical Biology*, 15(2), 249-256.

- 845 Schwab F, Bucheli TD, Lukhele LP, Magrez A, Nowack B, Sigg L, Knauer K. Are Carbon Nanotube Effects  
846 on Green Algae Caused by Shading and Agglomeration? *Environmental Science & Technology*, 45:  
847 6136-6144, 2011.
- 848 Schwartz E, Hasler AD (1966) Perception of surface waves by the blackstripe topminnow, *Fundulus*  
849 *notatus*. *J Fish Res Board Can* 23:1331–1352
- 850 Senthamizhan, A., Balusamy, B., & Uyar, T. (2020). Recent progress on designing electrospun  
851 nanofibers for colorimetric biosensing applications. *Current Opinion in Biomedical*  
852 *Engineering*, 13, 1-8.
- 853 Shafiq, M., Anjum, S., Hano, C., Anjum, I., & Abbasi, B. H. (2020). An Overview of the  
854 Applications of Nanomaterials and Nanodevices in the Food Industry. *Foods*, 9(2), 148.
- 855 Shen, Z. L., Nie, H. Y., Wang, H. F., Yang, B., Zhong, L. J., Zou, X. J., ... & Jia, G. (2010). Two  
856 types of MWNTs with different surface modifications induce differential expression of proteins  
857 in RAW264. 7 cells. *Beijing da xue xue bao. Yi xue ban= Journal of Peking University.*  
858 *Health sciences*, 42(3), 345.
- 859 Siddique, S., & Chow, J. C. (2020). Application of nanomaterials in biomedical imaging and cancer  
860 therapy. *Nanomaterials*, 10(9), 1700.
- 861 Siebum, A., van Wijk, A., Schoevaart, R., & Kieboom, T. (2006). Galactose oxidase and alcohol  
862 oxidase: Scope and limitations for the enzymatic synthesis of aldehydes. *Journal of Molecular*  
863 *Catalysis B: Enzymatic*, 41(3-4), 141-145.
- 864 Sies, H. (2020). Oxidative stress: Concept and some practical aspects. *Antioxidants*, 9(9), 852.
- 865 Sies, H., & Jones, D. P. (2020). Reactive oxygen species (ROS) as pleiotropic physiological  
866 signalling agents. *Nature Reviews Molecular Cell Biology*, 1-21.
- 867 Silva, F. F. D., Silva, J. M. D., Silva, T. D. J. D., Tenorio, B. M., Tenorio, F. D. C. A. M., Santos, E. L., ... &  
868 Soares, E. C. (2020). Evaluation of Nile tilapia (*Oreochromis niloticus*) fingerlings exposed to the  
869 pesticide pyriproxyfen. *Latin american journal of aquatic research*, 48(5), 826-835.
- 870 Singh, N. B. (2020). Properties of cement and concrete in presence of nanomaterials. In *Smart*  
871 *Nanoconcretes and Cement-Based Materials* (pp. 9-39). Elsevier.
- 872 Singh, S., Pandey, S. K., & Vishwakarma, N. (2020). Functional nanomaterials for the cosmetics  
873 industry. In *Handbook of Functionalized Nanomaterials for Industrial Applications* (pp. 717-  
874 730). Elsevier.
- 875 Sinha, A. K. (1972). Colorimetric assay of catalase. *Analytical biochemistry*, 47(2), 389-394.
- 876 Sohaebuddin, S. K., Thevenot, P. T., Baker, D., Eaton, J. W., & Tang, L. (2010). Nanomaterial  
877 cytotoxicity is composition, size, and cell type dependent. *Particle and fibre toxicology*, 7(1),  
878 22.

- 879 Soneja, A., Drews, M., & Malinski, T. (2005). Role of nitric oxide, nitroxidative and oxidative  
880 stress in wound healing. *Pharmacological reports*, 57, 108.
- 881 Srivastava, R. K., Pant, A. B., Kashyap, M. P., Kumar, V., Lohani, M., Jonas, L., & Rahman, Q.  
882 (2011). Multi-walled carbon nanotubes induce oxidative stress and apoptosis in human lung  
883 cancer cell line-A549. *Nanotoxicology*, 5(2), 195-207.
- 884 Strong, R., Martin, F. L., Jones, K. C., Shore, R. F., & Halsall, C. J. (2017). Subtle effects of  
885 environmental stress observed in the early life stages of the Common frog, *Rana temporaria*.  
886 *Scientific reports*, 7(1), 1-13.
- 887 Taran, M., Safaei, M., Karimi, N., & Almasi, A. (2020). Benefits and Application of  
888 Nanotechnology in Environmental Science: an Overview.
- 889 Tavabe, K. R., Yavar, M., Kabir, S., Akbary, P., & Aminikhoie, Z. (2020). Toxicity effects of multi-walled  
890 carbon nanotubes (MWCNTs) nanomaterial on the common carp (*Cyprinus carpio* L. 1758) in  
891 laboratory conditions. *Comparative Biochemistry and Physiology Part C: Toxicology & Pharmacology*,  
892 237, 108832.
- 893 Thomas, S., Grohens, Y., & Pottathara, Y. B. (Eds.). (2019). Industrial applications of  
894 nanomaterials. Elsevier.
- 895 Tschopp, J., & Schroder, K. (2010). NLRP3 inflammasome activation: The convergence of multiple  
896 signalling pathways on ROS production?. *Nature reviews immunology*, 10(3), 210-215.
- 897 Turner, N. J. (2011). Enantioselective oxidation of C–O and C–N bonds using oxidases. *Chemical*  
898 *reviews*, 111(7), 4073-4087.
- 899 Van-Herreweghe, F., Festjens, N., Declercq, W., & Vandenaabeele, P. (2010). Tumor necrosis  
900 factor-mediated cell death: to break or to burst, that's the question. *Cellular and Molecular*  
901 *Life Sciences*, 67(10), 1567-1579.
- 902 Velu, R., Calais, T., Jayakumar, A., & Raspall, F. (2020). A Comprehensive Review on Bio-  
903 Nanomaterials for Medical Implants and Feasibility Studies on Fabrication of Such Implants  
904 by Additive Manufacturing Technique. *Materials*, 13(1), 92.
- 905 Verneuil, L., Silvestre, J., Mouchet, F., Flahaut, E., Boutonnet, J. C., Bourdiol, F., ... & Pinelli, E. (2015).  
906 Multi-walled carbon nanotubes, natural organic matter, and the benthic diatom *Nitzschia palea*: "A  
907 sticky story". *Nanotoxicology*, 9(2), 219-229.
- 908 Wagner, N., Züghart, W., Mingo, V., & Lötters, S. (2014). Are deformation rates of anuran  
909 developmental stages suitable indicators for environmental pollution? Possibilities and  
910 limitations. *Ecological indicators*, 45, 394-401.

- 911 Walkley, A.; Black, I. A. An examination of the Degtjareff method for determining soil organic matter and a  
912 proposed modification of the chromic acid titration method. *Soil Science*, Baltimore, v. 37, n. 1, p. 29-  
913 38, Jan./ June 1934.
- 914 Wang, H., Yang, S. T., Cao, A., & Liu, Y. (2013). Quantification of carbon nanomaterials in vivo. *Accounts*  
915 *of chemical research*, 46(3), 750-760.
- 916 Wang, K., Liu, Q., Guan, Q. M., Wu, J., Li, H. N., & Yan, J. J. (2011). Enhanced direct  
917 electrochemistry of glucose oxidase and biosensing for glucose via synergy effect of graphene  
918 and CdS nanocrystals. *Biosensors and Bioelectronics*, 26(5), 2252-2257.
- 919 Wang, L., Wu, W. M., Bolan, N. S., Tsang, D. C., Li, Y., Qin, M., & Hou, D. (2020).  
920 Environmental fate, toxicity and risk management strategies of nanoplastics in the  
921 environment: Current status and future perspectives. *Journal of hazardous materials*, 401,  
922 123415.
- 923 Wang, X., Guo, J., Chen, T., Nie, H., Wang, H., Zang, J., ... & Jia, G. (2012). Multi-walled carbon  
924 nanotubes induce apoptosis via mitochondrial pathway and scavenger receptor. *Toxicology in*  
925 *Vitro*, 26(6), 799-806.
- 926 Wang, X., Guo, J., Chen, T., Nie, H., Wang, H., Zang, J., ... & Jia, G. (2012). Multi-walled carbon  
927 nanotubes induce apoptosis via mitochondrial pathway and scavenger receptor. *Toxicology in*  
928 *Vitro*, 26(6), 799-806.
- 929 Wang, Z., Zhang, K., Zhao, J., Liu, X., & Xing, B. (2010). Adsorption and inhibition of  
930 butyrylcholinesterase by different engineered nanoparticles. *Chemosphere*, 79(1), 86-92.
- 931 Wingfield, J. C., Maney, D. L., Breuner, C. W., Jacobs, J. D., Lynn, S., Ramenofsky, M., &  
932 Richardson, R. D. (1998). Ecological bases of hormone—behavior interactions: the  
933 “emergency life history stage”. *American Zoologist*, 38(1), 191-206.
- 934 Yadav, D., Amini, F., & Ehrmann, A. (2020). Recent advances in carbon nanofibers and their  
935 applications—a review. *European Polymer Journal*, 109963.
- 936 Yao, X., & Cadwell, K. (2020). Tumor Necrosis Factor- $\alpha$ -Induced Apoptosis in the Intestinal  
937 Epithelium due to Chronic Nuclear Factor Kappa B Signaling Is Mediated by Receptor  
938 Interacting Serine/Threonine Kinase 1. *Cellular and molecular gastroenterology and*  
939 *hepatology*, 9(2), 337.
- 940 Zeb, S., Ullah, I., Karim, A., Muhammad, W., Ullah, N., Khan, M., & Komal, W. (2019). A Review  
941 on Nanotechnology Applications in Electric Components. *Nanotechnology*, 2(2).
- 942 Zhao, J., Luo, W., Xu, Y., Ling, J., & Deng, L. (2020). Potential reproductive toxicity of multi-walled carbon  
943 nanotubes and their chronic exposure effects on the growth and development of *Xenopus tropicalis*.  
944 *Science of The Total Environment*, 142652.

- 945 Zhao, J., Xie, G., Xu, Y., Zheng, L., & Ling, J. (2020). Accumulation and toxicity of multi-walled  
946 carbon nanotubes in *Xenopus tropicalis* tadpoles. *Chemosphere*, 127205.
- 947 Zhou, K., Zhu, Y., Yang, X., & Li, C. (2010). Electrocatalytic Oxidation of Glucose by the Glucose  
948 Oxidase Immobilized in Graphene□Au□Nafion Biocomposite. *Electroanalysis: An*  
949 *International Journal Devoted to Fundamental and Practical Aspects of Electroanalysis*,  
950 22(3), 259-264.
- 951 Zhu, L., Chang, D. W., Dai, L., & Hong, Y. (2007). DNA damage induced by multiwalled carbon  
952 nanotubes in mouse embryonic stem cells. *Nano letters*, 7(12), 3592-3597.
- 953
